# Supplementary material for: Differential Effects of Oligosaccharides, Antioxidants, Amino Acids and PUFAs on Heat/Hypoxia-Induced Epithelial Injury in a Caco-2/HT-29 Co-Culture Model
Source: MDPI journal article supplement (doi:10.3390/ijms24021111), 2023-01-06
Supplement: s1 [file s1]

## **Supplementary materials to**

**“Differential effects of oligosaccharides, antioxidants, amino acids and PUFAs on heat/hypoxia-induced epithelial injury in a Caco-2/HT-29 co-culture model”**

**Puqiao Lian<sup>1</sup>, Paul A. J. Henricks<sup>1</sup>, Harry J. Wichers<sup>2</sup>, Gert Folkerts<sup>1</sup>, Saskia Braber<sup>1</sup>**

<sup>1</sup> Division of Pharmacology, Utrecht Institute for Pharmaceutical Sciences, Faculty of Science, Utrecht University, Utrecht, The Netherlands

<sup>2</sup> Food & Biobased Research, Wageningen University, Wageningen, the Netherlands

### **Corresponding author:**

S. Braber

Utrecht University, Department of Pharmaceutical Sciences, Division of Pharmacology

Universiteitsweg 99, 3584 CG, Utrecht, The Netherlands

Telephone: +31 302531599

Email: [s.braber@uu.nl](mailto:s.braber@uu.nl)

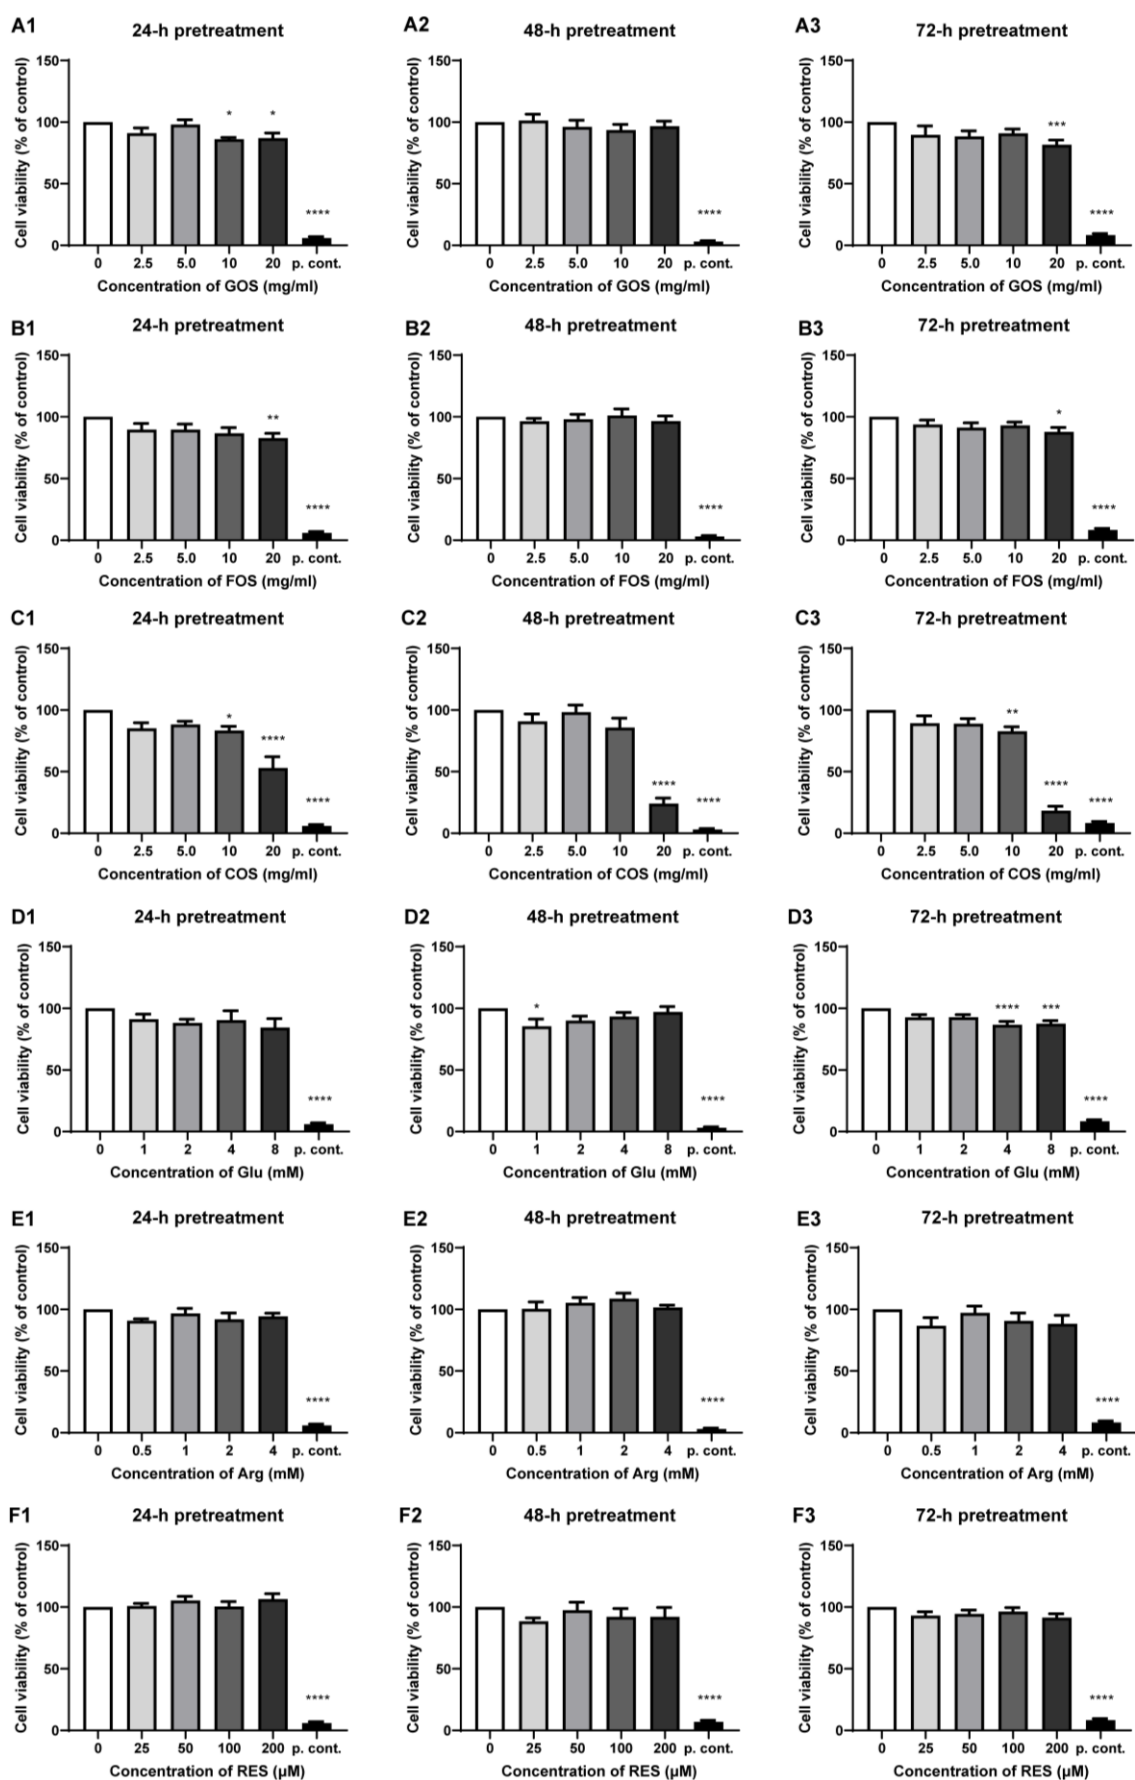

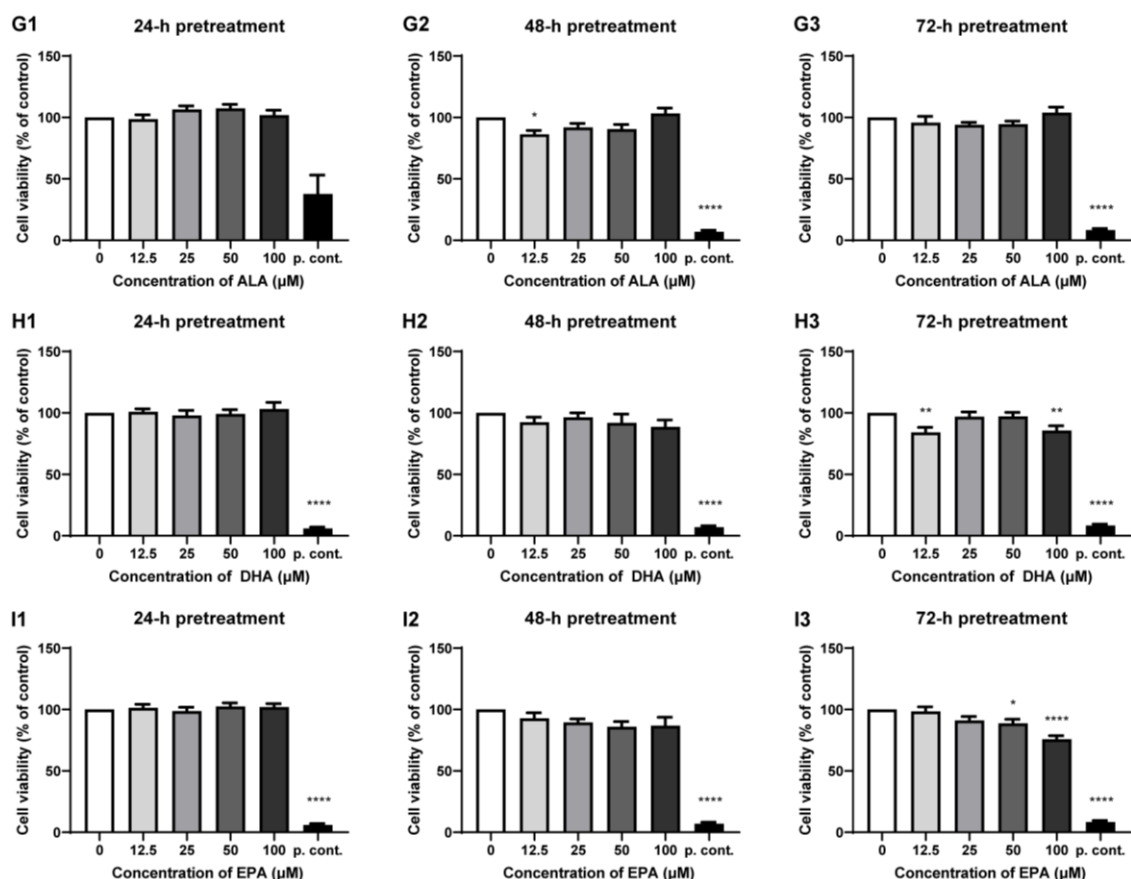

**Figure S1.** Cytotoxicity of the 9 nutritional components, GOS (**A1-A3**), FOS (**B1-B3**), COS (**C1-C3**), Glu (**D1-D3**), Arg (**E1-E3**), RES (**F1-F3**), ALA (**G1-G3**), DHA (**H1-H3**) and EPA (**I1-I3**), was evaluated by using a MTT assay without hypoxia and heat treatment. Four concentrations of the nutritional components were co-incubated with Caco-2/HT29 cells for 24, 48 and 72 h. All values were presented as means  $\pm$  SEM (N=3, n=6 (negative control, positive control, the lowest and the highest concentration groups in each figure) and n=3 (all other groups)). Statistical differences were analyzed by two-way ANOVA followed by the Bonferroni's multiple comparison test. \* $p < 0.05$ , \*\* $p < 0.01$ , \*\*\* $p < 0.001$  and \*\*\*\* $p < 0.0001$  versus control. GOS, galacto-oligosaccharides; FOS, fructo-oligosaccharides, COS, chitosan oligosaccharides; Glu, l-glutamine; Arg, l-arginine; RES, resveratrol; ALA,  $\alpha$ -lipoic acid; DHA, docosahexaenoic acid; EPA, eicosapentaenoic acid. p. cont, positive control.

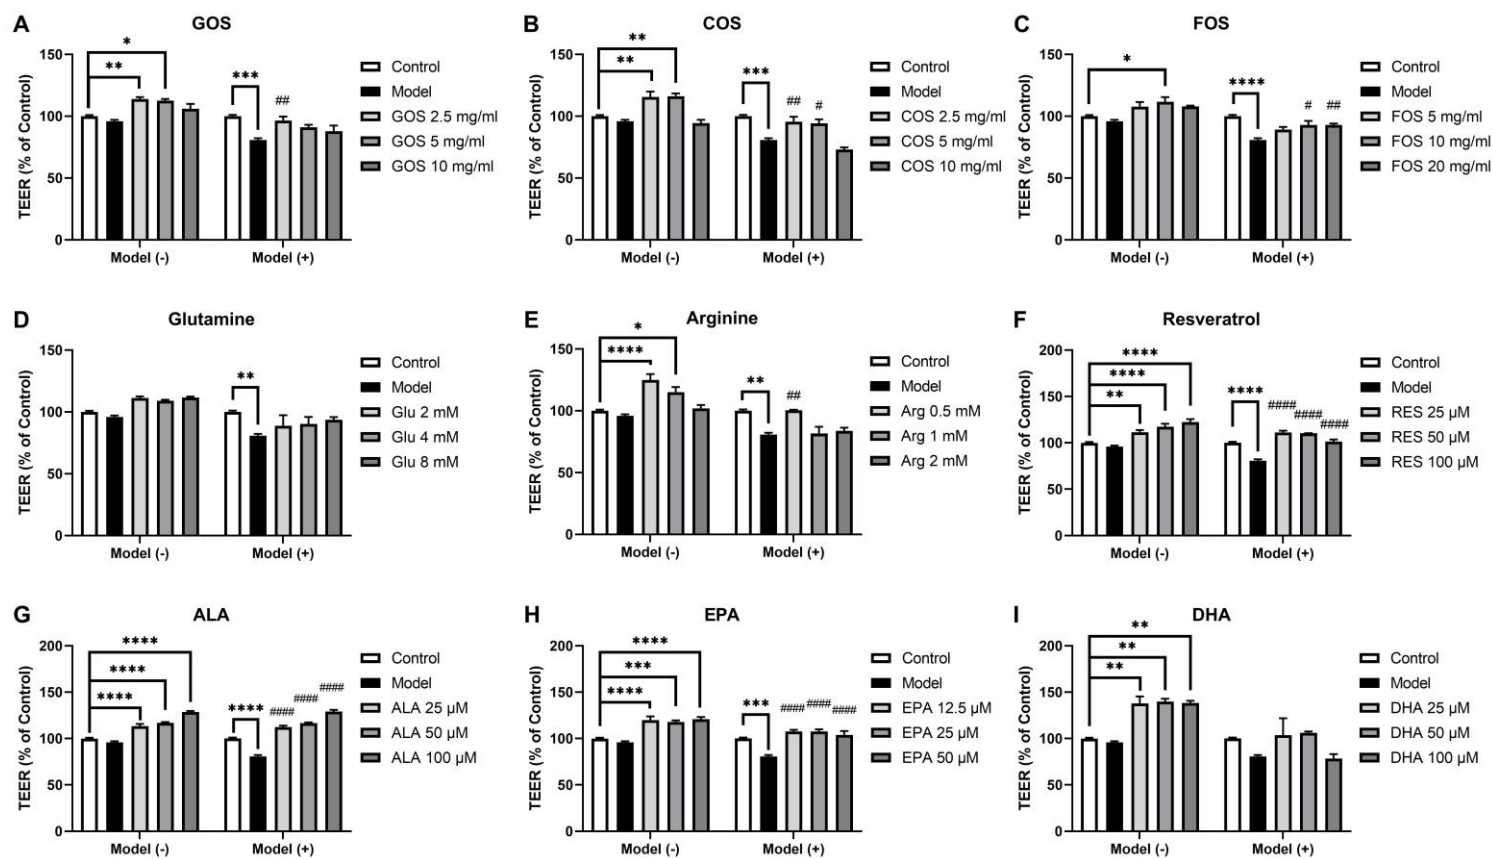

**Figure S2.** TEER values of Caco-2/HT-29 cell monolayer pre-treated with GOS (**A**), FOS (**B**), COS (**C**), Glu (**D**), Arg (**E**), RES (**F**), ALA (**G**), DHA (**H**) and EPA (**I**) for 48 h prior to hypoxia and heat exposure (2 h). Before and after hypoxia and heat exposure, TEER values were determined by using an epithelial volt-ohm meter. All values were presented as means  $\pm$  SEM (N=3, n=3). Statistical differences were analyzed by two-way ANOVA followed by the Bonferroni's multiple comparison test. \*p<0.05, \*\*p<0.01, \*\*\*p<0.001 and \*\*\*\*p<0.0001 versus control; #p<0.05, ##p<0.01 and ####p<0.0001 versus model. GOS, galacto-oligosaccharides; FOS, fructo-oligosaccharides; COS, chitosan oligosaccharides; Glu, l-glutamine; Arg, l-arginine; RES, resveratrol; ALA,  $\alpha$ -lipoic acid; DHA, docosahexaenoic acid; EPA, eicosapentaenoic acid.

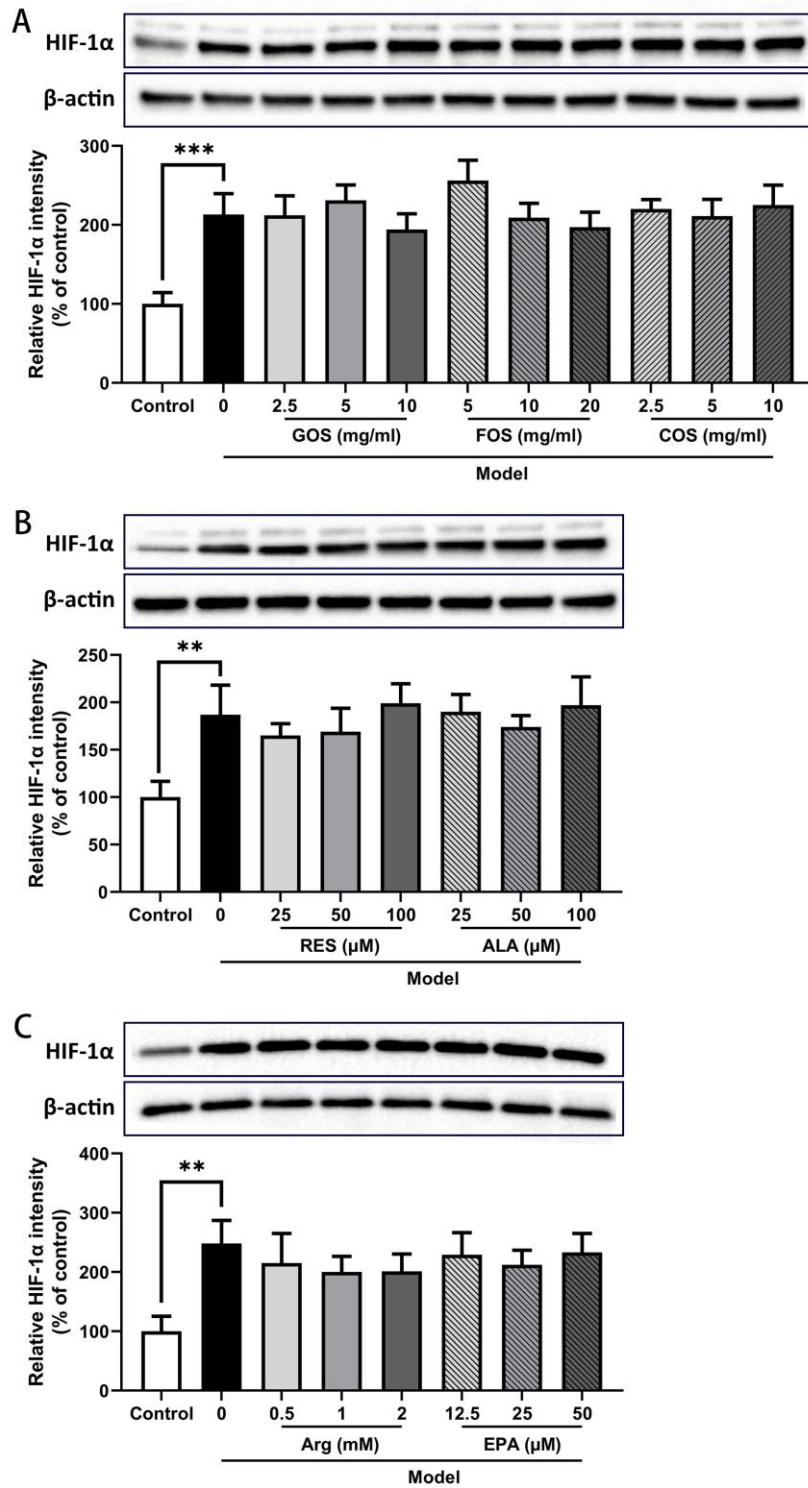

**Figure S3.** Relative HIF-1α protein expression level. Caco-2/HT-29 cell monolayer was pre-incubated with GOS, FOS, COS (A), RES, ALA (B), Arg and EPA (C) for 48 h then exposed to hypoxia and heat treatment (2 h). HIF-1α protein expression was determined by WB and normalized to β-actin. All values were presented as means ± SEM (N=3, n=2 (GOS, FOS, COS group) and n=3 (all other groups)). Statistical differences were analyzed by two-way ANOVA followed by the Bonferroni's multiple comparison test. \*\*p<0.01 and \*\*\*p<0.001 versus control. GOS, galacto-oligosaccharides; FOS, fructo-oligosaccharides, COS, chitosan oligosaccharides; ALA, α-lipoic acid; RES, resveratrol; Arg, l-arginine; EPA, eicosapentaenoic acid.

|              | Control     |          |          | Model        |          |          | GOS 2.5 mg/ml |          |          | GOS 5 mg/ml   |          |          | GOS 10 mg/ml |          |          |              |          |          |
|--------------|-------------|----------|----------|--------------|----------|----------|---------------|----------|----------|---------------|----------|----------|--------------|----------|----------|--------------|----------|----------|
|              | Repeat 1    | Repeat 2 | Repeat 3 | Repeat 1     | Repeat 2 | Repeat 3 | Repeat 1      | Repeat 2 | Repeat 3 | Repeat 1      | Repeat 2 | Repeat 3 | Repeat 1     | Repeat 2 | Repeat 3 |              |          |          |
| Triplicate 1 | 0.65215     | 0.590798 | 0.385412 | 0.857454     | 0.37345  | 0.681506 | 0.639685      | 0.592056 | 0.485574 | 0.855532      | 0.540792 | 0.306502 | 0.829279     | 0.417007 | 0.434575 |              |          |          |
| Triplicate 2 | 0.746664    | 0.412425 | 0.606056 | 0.886951     | 0.467435 | 0.334645 | 0.741071      | 0.454847 | 0.783766 | 0.952022      | 0.656096 | 0.811684 | 0.915328     | 0.496069 | 0.423537 |              |          |          |
| Triplicate 3 | 0.716546    | 0.525277 | 0.915536 | 0.501995     | 0.594627 | 0.667246 |               |          |          |               |          |          |              |          |          |              |          |          |
|              | FOS 5 mg/ml |          |          | FOS 10 mg/ml |          |          | FOS 20 mg/ml  |          |          | COS 2.5 mg/ml |          |          | COS 5 mg/ml  |          |          | COS 10 mg/ml |          |          |
|              | Repeat 1    | Repeat 2 | Repeat 3 | Repeat 1     | Repeat 2 | Repeat 3 | Repeat 1      | Repeat 2 | Repeat 3 | Repeat 1      | Repeat 2 | Repeat 3 | Repeat 1     | Repeat 2 | Repeat 3 | Repeat 1     | Repeat 2 | Repeat 3 |
| Triplicate 1 | 0.806847    | 0.437334 | 1.01971  | 0.640745     | 0.431409 | 0.107668 | 0.633731      | 0.538809 | 0.849447 | 0.762655      | 0.444423 | 0.234186 | 0.775662     | 0.526018 | 0.848737 | 0.65248      | 0.453781 | 0.241862 |
| Triplicate 2 | 0.692147    | 0.596983 | 0.613176 | 0.853525     | 0.503728 | 0.179078 | 0.721767      | 0.371478 | 0.647205 | 0.715558      | 0.389561 | 0.822279 | 0.50905      | 0.497272 | 0.69312  | 0.618186     | 0.568789 | 0.804996 |
| Triplicate 3 |             |          |          |              |          |          |               |          |          |               |          |          |              |          |          |              |          |          |
|              | Control     |          |          | Model        |          |          | Arg 1 mM      |          |          | Arg 2 mM      |          |          | Arg 4 mM     |          |          |              |          |          |
|              | Repeat 1    | Repeat 2 | Repeat 3 | Repeat 1     | Repeat 2 | Repeat 3 | Repeat 1      | Repeat 2 | Repeat 3 | Repeat 1      | Repeat 2 | Repeat 3 | Repeat 1     | Repeat 2 | Repeat 3 |              |          |          |
| Triplicate 1 | 0.703108    | 0.571894 | 0.752331 | 0.844359     | 0.501425 | 0.75124  | 0.591313      | 0.484435 | 1.040087 | 0.741574      | 0.656786 | 0.334978 | 0.826482     | 0.41451  | 0.715579 |              |          |          |
| Triplicate 2 | 0.592899    | 0.621237 | 0.810731 | 0.679031     | 0.4153   | 0.657683 | 0.635697      | 0.50129  | 0.480523 | 0.62127       | 0.451432 | 0.397084 | 0.709482     | 0.419014 | 0.733387 |              |          |          |
| Triplicate 3 | 0.753833    | 0.381863 | 0.064433 | 0.556377     | 0.64277  | 0.72169  | 0.980823      | 0.542776 | 0.498197 | 0.665155      | 0.559764 | 0.56002  | 0.601236     | 0.694976 | 0.51394  |              |          |          |
|              | EPA 12.5 µM |          |          | EPA 25 µM    |          |          | EPA 50 µM     |          |          |               |          |          |              |          |          |              |          |          |
|              | Repeat 1    | Repeat 2 | Repeat 3 | Repeat 1     | Repeat 2 | Repeat 3 | Repeat 1      | Repeat 2 | Repeat 3 |               |          |          |              |          |          |              |          |          |
| Triplicate 1 | 0.786702    | 0.526818 | 0.620663 | 0.776487     | 0.622313 | 0.860252 | 0.6508        | 0.610861 | 0.641418 |               |          |          |              |          |          |              |          |          |
| Triplicate 2 | 0.832175    | 0.523734 | 0.577311 | 0.630657     | 0.433649 | 0.24335  | 0.673795      | 0.578835 | 0.577947 |               |          |          |              |          |          |              |          |          |
| Triplicate 3 | 0.605684    | 0.524441 | 0.373618 | 0.708215     | 0.503534 | 0.803402 | 0.834444      | 0.52478  | 0.743541 |               |          |          |              |          |          |              |          |          |
|              | Control     |          |          | Model        |          |          | RES 25 µM     |          |          | RES 50 µM     |          |          | RES 100 µM   |          |          |              |          |          |
|              | Repeat 1    | Repeat 2 | Repeat 3 | Repeat 1     | Repeat 2 | Repeat 3 | Repeat 1      | Repeat 2 | Repeat 3 | Repeat 1      | Repeat 2 | Repeat 3 | Repeat 1     | Repeat 2 | Repeat 3 |              |          |          |
| Triplicate 1 | 0.624697    | 0.537771 | 0.976209 | 0.766089     | 0.538665 | 0.729742 | 0.676842      | 0.584785 | 0.374659 | 0.764653      | 0.536859 | 0.478188 | 0.757792     | 0.56839  | 0.470817 |              |          |          |
| Triplicate 2 | 0.624241    | 0.594578 | 0.406261 | 0.610101     | 0.556851 | 0.636793 | 0.711745      | 0.521842 | 0.625496 | 0.700092      | 0.657244 | 0.780962 | 0.70105      | 0.536125 | 0.46535  |              |          |          |
| Triplicate 3 | 0.822742    | 0.396152 | 0.636338 | 0.703576     | 0.61896  | 0.764077 | 0.819246      | 0.421873 | 0.795045 | 1.042872      | 0.473878 | 0.032931 | 0.678358     | 0.423984 | 0.355916 |              |          |          |
|              | ALA 25 µM   |          |          | ALA 50 µM    |          |          | ALA 100 µM    |          |          |               |          |          |              |          |          |              |          |          |
|              | Repeat 1    | Repeat 2 | Repeat 3 | Repeat 1     | Repeat 2 | Repeat 3 | Repeat 1      | Repeat 2 | Repeat 3 |               |          |          |              |          |          |              |          |          |
| Triplicate 1 | 0.641279    | 0.617514 | 0.54595  | 0.819939     | 0.501634 | 0.828766 | 0.851962      | 0.628547 | 0.343331 |               |          |          |              |          |          |              |          |          |
| Triplicate 2 | 0.746518    | 0.550037 | 0.505543 | 0.628341     | 0.587599 | 0.843728 | 0.892256      | 0.505138 | 0.976269 |               |          |          |              |          |          |              |          |          |
| Triplicate 3 | 0.836764    | 0.407442 | 1.414531 | 0.66708      | 0.439267 | 0.23451  | 0.611383      | 0.580791 | 0.643305 |               |          |          |              |          |          |              |          |          |

The standard curves:  $y=0.00052x-0.00832$ ,  $r^2=0.921$  (repeat 1);  $y=0.000369x-0.0071$ ,  $r^2=0.9831$  (repeat 2);  $y=0.001331x-1.265$ ,  $r^2=0.899$  (repeat 3); y: LDH concentration (µg/ml), x: OD value.

**Table S1.** Raw colorimetric readings from three repeats of the LDH experiments using triplicates.

|              | Control     |          |          | Model        |          |          | GOS 2.5 mg/ml |          |          | GOS 5 mg/ml   |          |          | GOS 10 mg/ml |          |          |              |          |          |
|--------------|-------------|----------|----------|--------------|----------|----------|---------------|----------|----------|---------------|----------|----------|--------------|----------|----------|--------------|----------|----------|
|              | Repeat 1    | Repeat 2 | Repeat 3 | Repeat 1     | Repeat 2 | Repeat 3 | Repeat 1      | Repeat 2 | Repeat 3 | Repeat 1      | Repeat 2 | Repeat 3 | Repeat 1     | Repeat 2 | Repeat 3 |              |          |          |
| Triplicate 1 | 1135        | 1169     | 1202     | 892          | 977      | 981      | 1139          | 1075     | 1191     | 1002          | 1066     | 1126     | 1118         | 1012     | 978      |              |          |          |
| Triplicate 2 | 1161        | 1184     | 1179     | 910          | 990      | 949      | 1119          | 1065     | 1215     | 992           | 1076     | 1130     | 1111         | 1031     | 946      |              |          |          |
| Triplicate 3 | 1162        | 1172     | 1202     | 906          | 968      | 962      | 1125          | 1042     | 1226     | 1026          | 1088     | 1116     | 1102         | 1019     | 954      |              |          |          |
|              | FOS 5 mg/ml |          |          | FOS 10 mg/ml |          |          | FOS 20 mg/ml  |          |          | COS 2.5 mg/ml |          |          | COS 5 mg/ml  |          |          | COS 10 mg/ml |          |          |
|              | Repeat 1    | Repeat 2 | Repeat 3 | Repeat 1     | Repeat 2 | Repeat 3 | Repeat 1      | Repeat 2 | Repeat 3 | Repeat 1      | Repeat 2 | Repeat 3 | Repeat 1     | Repeat 2 | Repeat 3 | Repeat 1     | Repeat 2 | Repeat 3 |
| Triplicate 1 | 1030        | 986      | 1113     | 1056         | 1017     | 1174     | 1050          | 1080     | 1135     | 1058          | 1065     | 1252     | 1115         | 1114     | 1068     | 811          | 886      | 853      |
| Triplicate 2 | 1018        | 984      | 1105     | 1080         | 1021     | 1159     | 1048          | 1105     | 1136     | 1069          | 1068     | 1218     | 1142         | 1135     | 1034     | 808          | 882      | 862      |
| Triplicate 3 | 1022        | 1037     | 1117     | 1064         | 1030     | 1204     | 1042          | 1111     | 1115     | 1071          | 1057     | 1243     | 1144         | 1148     | 1044     | 807          | 917      | 896      |
|              | Arg 1 mM    |          |          | Arg 2 mM     |          |          | Arg 4 mM      |          |          | EPA 12.5 µM   |          |          | EPA 25 µM    |          |          | EPA 50 µM    |          |          |
|              | Repeat 1    | Repeat 2 | Repeat 3 | Repeat 1     | Repeat 2 | Repeat 3 | Repeat 1      | Repeat 2 | Repeat 3 | Repeat 1      | Repeat 2 | Repeat 3 | Repeat 1     | Repeat 2 | Repeat 3 | Repeat 1     | Repeat 2 | Repeat 3 |
| Triplicate 1 | 1148        | 1209     | 1201     | 1026         | 1011     | 837      | 1010          | 984      | 938      | 1208          | 1299     | 1305     | 1286         | 1235     | 1250     | 1121         | 1273     | 1271     |
| Triplicate 2 | 1167        | 1202     | 1170     | 1008         | 1019     | 861      | 1026          | 974      | 944      | 1181          | 1279     | 1312     | 1277         | 1245     | 1277     | 1118         | 1293     | 1279     |
| Triplicate 3 | 1135        | 1164     | 1199     | 1010         | 1006     | 835      | 995           | 1022     | 948      | 1205          | 1276     | 1304     | 1312         | 1247     | 1245     | 1076         | 1277     | 1287     |
|              | RES 25 µM   |          |          | RES 50 µM    |          |          | RES 100 µM    |          |          | ALA 25 µM     |          |          | ALA 50 µM    |          |          | ALA 100 µM   |          |          |
|              | Repeat 1    | Repeat 2 | Repeat 3 | Repeat 1     | Repeat 2 | Repeat 3 | Repeat 1      | Repeat 2 | Repeat 3 | Repeat 1      | Repeat 2 | Repeat 3 | Repeat 1     | Repeat 2 | Repeat 3 | Repeat 1     | Repeat 2 | Repeat 3 |
| Triplicate 1 | 1269        | 1301     | 1379     | 1266         | 1283     | 1310     | 1204          | 1188     | 1178     | 1247          | 1325     | 1391     | 1329         | 1373     | 1389     | 1456         | 1523     | 1570     |
| Triplicate 2 | 1252        | 1289     | 1392     | 1288         | 1296     | 1321     | 1188          | 1197     | 1166     | 1277          | 1315     | 1360     | 1316         | 1373     | 1384     | 1465         | 1530     | 1574     |
| Triplicate 3 | 1242        | 1264     | 1349     | 1256         | 1296     | 1330     | 1217          | 1230     | 1147     | 1263          | 1320     | 1369     | 1337         | 1408     | 1415     | 1416         | 1547     | 1562     |

**Table S2.** Raw TEER readings from three repeats of the experiments using triplicates.



|                     | Control     |          |          | Model        |          |          | GOS 2.5 mg/ml |          |          | GOS 5 mg/ml   |          |          | GOS 10 mg/ml |          |          |              |          |          |
|---------------------|-------------|----------|----------|--------------|----------|----------|---------------|----------|----------|---------------|----------|----------|--------------|----------|----------|--------------|----------|----------|
|                     | Repeat 1    | Repeat 2 | Repeat 3 | Repeat 1     | Repeat 2 | Repeat 3 | Repeat 1      | Repeat 2 | Repeat 3 | Repeat 1      | Repeat 2 | Repeat 3 | Repeat 1     | Repeat 2 | Repeat 3 |              |          |          |
| <b>Triplicate 1</b> | 1.937746    | 1.410663 | 2.40579  | 2.100993     | 1.712118 | 3.0289   | 2.533384      | 1.66104  | 3.379464 | 1.979836      | 1.167967 | 2.815662 | 1.668027     | 1.17793  | 2.640906 |              |          |          |
| <b>Triplicate 2</b> | 1.954747    | 1.424867 | 2.344435 | 2.142643     | 1.73866  | 3.05489  | 2.55359       | 1.689727 | 3.384672 | 1.98793       | 1.255182 | 2.697947 | 1.714981     | 1.196474 | 2.453487 |              |          |          |
| <b>Triplicate 3</b> | 1.918914    | 1.365438 | 2.383693 | 2.20342      | 1.739544 | 2.786418 |               |          |          |               |          |          |              |          |          |              |          |          |
|                     | FOS 5 mg/ml |          |          | FOS 10 mg/ml |          |          | FOS 20 mg/ml  |          |          | COS 2.5 mg/ml |          |          | COS 5 mg/ml  |          |          | COS 10 mg/ml |          |          |
|                     | Repeat 1    | Repeat 2 | Repeat 3 | Repeat 1     | Repeat 2 | Repeat 3 | Repeat 1      | Repeat 2 | Repeat 3 | Repeat 1      | Repeat 2 | Repeat 3 | Repeat 1     | Repeat 2 | Repeat 3 | Repeat 1     | Repeat 2 | Repeat 3 |
| <b>Triplicate 1</b> | 2.002069    | 2.003014 | 2.938484 | 1.607397     | 1.316788 | 3.122225 | 1.436521      | 1.47586  | 2.221965 | 0.983459      | 1.458692 | 3.290038 | 1.38701      | 1.597586 | 2.425953 | 3.137661     | 1.506052 | 3.493746 |
| <b>Triplicate 2</b> | 2.08483     | 2.118604 | 2.892928 | 1.610529     | 1.318357 | 3.092005 | 1.427254      | 1.519794 | 2.118479 | 0.999161      | 1.440905 | 3.215464 | 1.408184     | 1.641812 | 2.399113 | 3.120383     | 1.526367 | 3.625816 |
| <b>Triplicate 3</b> |             |          |          |              |          |          |               |          |          |               |          |          |              |          |          |              |          |          |
|                     | Control     |          |          | Model        |          |          | Arg 1 mM      |          |          | Arg 2 mM      |          |          | Arg 4 mM     |          |          |              |          |          |
|                     | Repeat 1    | Repeat 2 | Repeat 3 | Repeat 1     | Repeat 2 | Repeat 3 | Repeat 1      | Repeat 2 | Repeat 3 | Repeat 1      | Repeat 2 | Repeat 3 | Repeat 1     | Repeat 2 | Repeat 3 |              |          |          |
| <b>Triplicate 1</b> | 1.545292    | 1.087839 | 2.125845 | 2.020768     | 1.646481 | 3.072199 | 2.186092      | 1.88052  | 3.890652 | 1.954258      | 1.08887  | 2.464539 | 1.908676     | 1.087171 | 3.575166 |              |          |          |
| <b>Triplicate 2</b> | 1.535959    | 1.05797  | 2.085976 | 2.108253     | 1.621947 | 3.049029 | 2.171463      | 1.874215 | 3.931743 | 1.91963       | 1.169221 | 2.532516 | 1.972356     | 1.114675 | 3.471175 |              |          |          |
| <b>Triplicate 3</b> | 1.594763    | 1.178899 | 2.286685 | 2.050526     | 1.5887   | 2.966064 | 2.22898       | 1.928044 | 4.055808 | 2.056803      | 1.091462 | 2.468642 | 1.96312      | 1.118426 | 3.482476 |              |          |          |
|                     | EPA 12.5 µM |          |          | EPA 25 µM    |          |          | EPA 50 µM     |          |          |               |          |          |              |          |          |              |          |          |
|                     | Repeat 1    | Repeat 2 | Repeat 3 | Repeat 1     | Repeat 2 | Repeat 3 | Repeat 1      | Repeat 2 | Repeat 3 |               |          |          |              |          |          |              |          |          |
| <b>Triplicate 1</b> | 1.814645    | 1.502482 | 2.789068 | 1.251522     | 1.539419 | 2.275219 | 1.713399      | 1.228477 | 1.960899 |               |          |          |              |          |          |              |          |          |
| <b>Triplicate 2</b> | 1.769937    | 1.436944 | 2.720324 | 1.139568     | 1.598585 | 2.359314 | 1.730948      | 1.214716 | 2.022146 |               |          |          |              |          |          |              |          |          |
| <b>Triplicate 3</b> | 1.680747    | 1.476457 | 2.647333 | 1.181867     | 1.547053 | 2.159161 | 1.853721      | 1.236572 | 1.929987 |               |          |          |              |          |          |              |          |          |
|                     | Control     |          |          | Model        |          |          | RES 25 µM     |          |          | RES 50 µM     |          |          | RES 100 µM   |          |          |              |          |          |
|                     | Repeat 1    | Repeat 2 | Repeat 3 | Repeat 1     | Repeat 2 | Repeat 3 | Repeat 1      | Repeat 2 | Repeat 3 | Repeat 1      | Repeat 2 | Repeat 3 | Repeat 1     | Repeat 2 | Repeat 3 |              |          |          |
| <b>Triplicate 1</b> | 2.073549    | 1.755045 | 2.93939  | 3.776967     | 3.554346 | 5.730498 | 4.017644      | 2.384356 | 5.045137 | 2.427119      | 3.071869 | 2.713741 | 2.824694     | 1.991358 | 4.932203 |              |          |          |
| <b>Triplicate 2</b> | 2.122422    | 1.680146 | 3.108845 | 3.803694     | 3.583298 | 5.70345  | 3.982898      | 2.418664 | 4.98923  | 2.292998      | 3.076078 | 2.818499 | 2.846985     | 1.934822 | 4.987529 |              |          |          |
| <b>Triplicate 3</b> | 1.942467    | 1.803865 | 2.951171 | 3.635897     | 3.650364 | 5.746251 | 4.088521      | 2.337125 | 4.994588 | 2.396473      | 3.079912 | 2.659198 | 2.981481     | 2.07573  | 4.749617 |              |          |          |
|                     | ALA 25 µM   |          |          | ALA 50 µM    |          |          | ALA 100 µM    |          |          |               |          |          |              |          |          |              |          |          |
|                     | Repeat 1    | Repeat 2 | Repeat 3 | Repeat 1     | Repeat 2 | Repeat 3 | Repeat 1      | Repeat 2 | Repeat 3 |               |          |          |              |          |          |              |          |          |
| <b>Triplicate 1</b> | 2.979108    | 3.706805 | 5.562992 | 1.585809     | 2.014222 | 2.059531 | 1.892697      | 1.880755 | 3.649    |               |          |          |              |          |          |              |          |          |
| <b>Triplicate 2</b> | 2.995642    | 3.783994 | 5.505855 | 1.553478     | 1.940332 | 2.063936 | 1.956666      | 1.824613 | 3.589768 |               |          |          |              |          |          |              |          |          |
| <b>Triplicate 3</b> | 3.032285    | 3.715876 | 5.372982 | 1.672299     | 2.041398 | 2.092912 | 1.999304      | 1.917889 | 3.885288 |               |          |          |              |          |          |              |          |          |

The standard curves:  $y=0.1214x+1.9$ ,  $r^2=0.977$  (repeat 1);  $y=0.0981x-2.29$ ,  $r^2=0.9991$  (repeat 2);  $y=0.1715x+0.2658$ ,  $r^2=0.9892$  (repeat 3); y: LY concentration (µM), x: relative fluorescent intensity.

**Table S3.** Raw fluorometric readings from three repeats of the LY permeability experiments using triplicates.

|              | Control     |          |          | Model        |          |          | GOS 2.5 mg/ml |          |          | GOS 5 mg/ml   |          |          | GOS 10 mg/ml |          |          |              |          |          |
|--------------|-------------|----------|----------|--------------|----------|----------|---------------|----------|----------|---------------|----------|----------|--------------|----------|----------|--------------|----------|----------|
|              | Repeat 1    | Repeat 2 | Repeat 3 | Repeat 1     | Repeat 2 | Repeat 3 | Repeat 1      | Repeat 2 | Repeat 3 | Repeat 1      | Repeat 2 | Repeat 3 | Repeat 1     | Repeat 2 | Repeat 3 |              |          |          |
| Triplicate 1 | 0.19091     | 0.302814 | 0.263512 | 0.236126     | 0.385692 | 0.293685 | 0.234344      | 0.473364 | 0.279846 | 0.261249      | 0.373033 | 0.269951 | 0.257164     | 0.41859  | 0.263342 |              |          |          |
| Triplicate 2 | 0.222291    | 0.273923 | 0.261608 | 0.248023     | 0.401791 | 0.291946 | 0.224174      | 0.482294 | 0.277826 | 0.243601      | 0.371414 | 0.266337 | 0.24906      | 0.39645  | 0.264979 |              |          |          |
| Triplicate 3 | 0.195605    | 0.355998 | 0.270773 | 0.220899     | 0.38502  | 0.289729 |               |          |          |               |          |          |              |          |          |              |          |          |
|              | FOS 5 mg/ml |          |          | FOS 10 mg/ml |          |          | FOS 20 mg/ml  |          |          | COS 2.5 mg/ml |          |          | COS 5 mg/ml  |          |          | COS 10 mg/ml |          |          |
|              | Repeat 1    | Repeat 2 | Repeat 3 | Repeat 1     | Repeat 2 | Repeat 3 | Repeat 1      | Repeat 2 | Repeat 3 | Repeat 1      | Repeat 2 | Repeat 3 | Repeat 1     | Repeat 2 | Repeat 3 | Repeat 1     | Repeat 2 | Repeat 3 |
| Triplicate 1 | 0.299109    | 0.398544 | 0.285948 | 0.236603     | 0.430679 | 0.253684 | 0.264908      | 0.494392 | 0.275744 | 0.236704      | 0.284011 | 0.254348 | 0.254397     | 0.424758 | 0.252756 | 0.353923     | 0.514836 | 0.303018 |
| Triplicate 2 | 0.263753    | 0.42235  | 0.283351 | 0.203681     | 0.424224 | 0.253462 | 0.283813      | 0.474061 | 0.280292 | 0.260333      | 0.307194 | 0.242583 | 0.236792     | 0.411465 | 0.259391 | 0.348626     | 0.447013 | 0.30042  |
| Triplicate 3 |             |          |          |              |          |          |               |          |          |               |          |          |              |          |          |              |          |          |
|              | Control     |          |          | Model        |          |          | Arg 1 mM      |          |          | Arg 2 mM      |          |          | Arg 4 mM     |          |          |              |          |          |
|              | Repeat 1    | Repeat 2 | Repeat 3 | Repeat 1     | Repeat 2 | Repeat 3 | Repeat 1      | Repeat 2 | Repeat 3 | Repeat 1      | Repeat 2 | Repeat 3 | Repeat 1     | Repeat 2 | Repeat 3 |              |          |          |
| Triplicate 1 | 0.197166    | 0.369674 | 0.26478  | 0.337966     | 0.462137 | 0.27956  | 0.224225      | 0.421634 | 0.274998 | 0.247216      | 0.358442 | 0.276168 | 0.305872     | 0.366852 | 0.279022 |              |          |          |
| Triplicate 2 | 0.194175    | 0.35095  | 0.264664 | 0.312304     | 0.471744 | 0.276644 | 0.239481      | 0.437961 | 0.281662 | 0.24515       | 0.291077 | 0.272744 | 0.331217     | 0.383151 | 0.283886 |              |          |          |
| Triplicate 3 | 0.214092    | 0.332932 | 0.254946 | 0.321589     | 0.430819 | 0.273453 | 0.24828       | 0.350722 | 0.273938 | 0.289464      | 0.323978 | 0.267899 | 0.35526      | 0.354519 | 0.272672 |              |          |          |
|              | EPA 12.5 µM |          |          | EPA 25 µM    |          |          | EPA 50 µM     |          |          |               |          |          |              |          |          |              |          |          |
|              | Repeat 1    | Repeat 2 | Repeat 3 | Repeat 1     | Repeat 2 | Repeat 3 | Repeat 1      | Repeat 2 | Repeat 3 |               |          |          |              |          |          |              |          |          |
| Triplicate 1 | 0.318178    | 0.285335 | 0.265809 | 0.246563     | 0.363887 | 0.277227 | 0.244534      | 0.285972 | 0.262163 |               |          |          |              |          |          |              |          |          |
| Triplicate 2 | 0.349469    | 0.3102   | 0.273667 | 0.227804     | 0.335475 | 0.275478 | 0.233624      | 0.322174 | 0.263761 |               |          |          |              |          |          |              |          |          |
| Triplicate 3 | 0.328757    | 0.219717 | 0.272003 | 0.252791     | 0.333494 | 0.261047 | 0.212314      | 0.248129 | 0.272364 |               |          |          |              |          |          |              |          |          |
|              | Control     |          |          | Model        |          |          | RES 25 µM     |          |          | RES 50 µM     |          |          | RES 100 µM   |          |          |              |          |          |
|              | Repeat 1    | Repeat 2 | Repeat 3 | Repeat 1     | Repeat 2 | Repeat 3 | Repeat 1      | Repeat 2 | Repeat 3 | Repeat 1      | Repeat 2 | Repeat 3 | Repeat 1     | Repeat 2 | Repeat 3 |              |          |          |
| Triplicate 1 | 0.270063    | 0.315693 | 0.254749 | 0.366147     | 0.403963 | 0.3026   | 0.297372      | 0.427639 | 0.269831 | 0.245992      | 0.330704 | 0.280607 | 0.319579     | 0.380413 | 0.264316 |              |          |          |
| Triplicate 2 | 0.272428    | 0.266526 | 0.257555 | 0.389232     | 0.454841 | 0.31257  | 0.306816      | 0.4458   | 0.269417 | 0.220407      | 0.335294 | 0.270595 | 0.289072     | 0.354632 | 0.263608 |              |          |          |
| Triplicate 3 | 0.21876     | 0.313126 | 0.258571 | 0.40575      | 0.456249 | 0.308982 | 0.266223      | 0.453149 | 0.271903 | 0.237104      | 0.414184 | 0.272964 | 0.279944     | 0.379198 | 0.24767  |              |          |          |
|              | ALA 25 µM   |          |          | ALA 50 µM    |          |          | ALA 100 µM    |          |          |               |          |          |              |          |          |              |          |          |
|              | Repeat 1    | Repeat 2 | Repeat 3 | Repeat 1     | Repeat 2 | Repeat 3 | Repeat 1      | Repeat 2 | Repeat 3 |               |          |          |              |          |          |              |          |          |
| Triplicate 1 | 0.271186    | 0.368813 | 0.276572 | 0.177041     | 0.337913 | 0.305258 | 0.321753      | 0.308921 | 0.286896 |               |          |          |              |          |          |              |          |          |
| Triplicate 2 | 0.301911    | 0.313058 | 0.276626 | 0.190005     | 0.391449 | 0.29836  | 0.330698      | 0.349952 | 0.283721 |               |          |          |              |          |          |              |          |          |
| Triplicate 3 | 0.312415    | 0.352439 | 0.270056 | 0.211135     | 0.332838 | 0.309219 | 0.358486      | 0.318204 | 0.278149 |               |          |          |              |          |          |              |          |          |

The standard curves:  $y=0.508x+0.0019$ ,  $r^2=0.994$  (repeat 1);  $y=0.0791x-0.0221$ ,  $r^2=0.9881$  (repeat 2);  $y=0.0121x+0.2113$ ,  $r^2=0.991$  (repeat 3); y: MDA concentration (nM), x: OD value.

**Table S4.** Raw colorimetric readings from the three repeats of the MDA experiments using triplicates.
