# Supplementary material for: Differential Effects of Oligosaccharides, Antioxidants, Amino Acids and PUFAs on Heat/Hypoxia-Induced Epithelial Injury in a Caco-2/HT-29 Co-Culture Model
Source: MDPI journal article supplement (doi:10.3390/ijms24021111), 2023-01-06
Supplement: s1 [file s1]

**Original images of all blot results reported in the main article and  
the supplementary materials of**

**“Differential effects of oligosaccharides, antioxidants, amino acids and  
PUFAs on heat/hypoxia-induced epithelial injury in a Caco-2/HT-29  
co-culture model”**

**Puqiao Lian<sup>1</sup>, Paul A. J. Henricks<sup>1</sup>, Harry J. Wichers<sup>2</sup>, Gert Folkerts<sup>1</sup>, Saskia Braber<sup>1</sup>**

<sup>1</sup> Division of Pharmacology, Utrecht Institute for Pharmaceutical Sciences, Faculty of Science,  
Utrecht University, Utrecht, The Netherlands

<sup>2</sup> Food & Biobased Research, Wageningen University, Wageningen, the Netherlands

**Corresponding author:**

S. Braber

Utrecht University, Department of Pharmaceutical Sciences, Division of Pharmacology

Universiteitsweg 99, 3584 CG, Utrecht, The Netherlands

Telephone: +31 302531599

Email: s.braber@uu.nl

**Original blot images supporting Figure 4:**

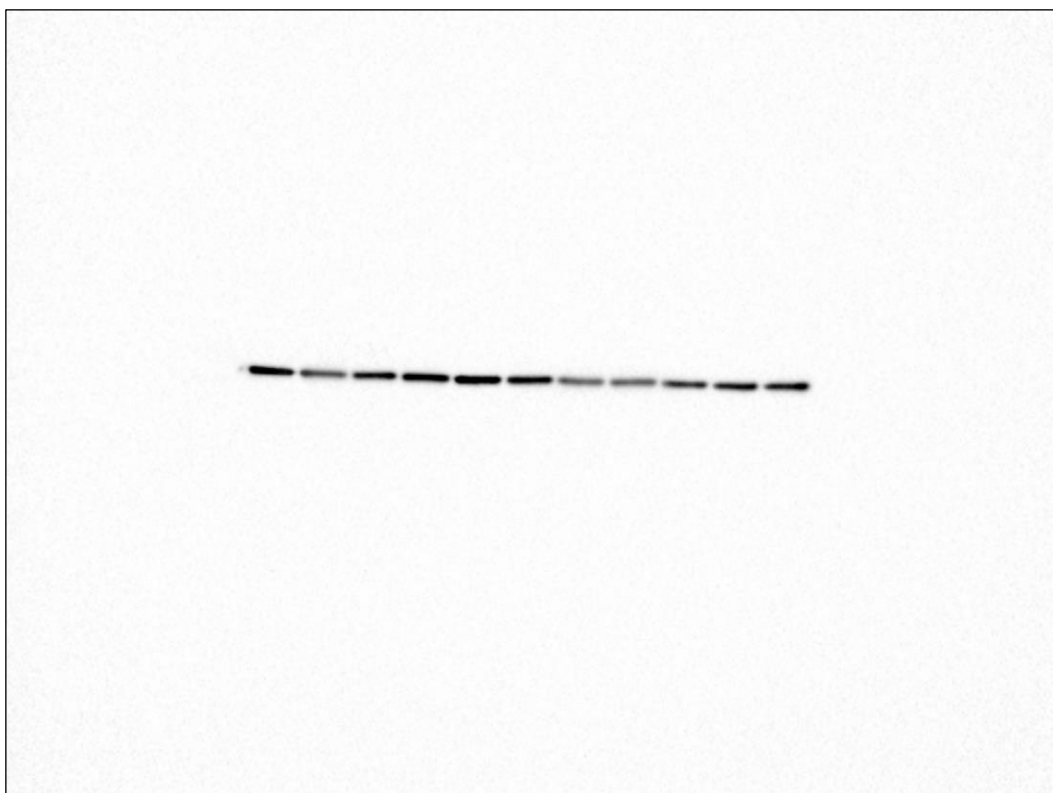

Repeat 1 of ZO-1, lanes from left to right: Control, Model, GOS 2.5, 5, 10 mg/ml, FOS 5, 10, 20 mg/ml, COS 2.5, 5, 10 mg/ml.

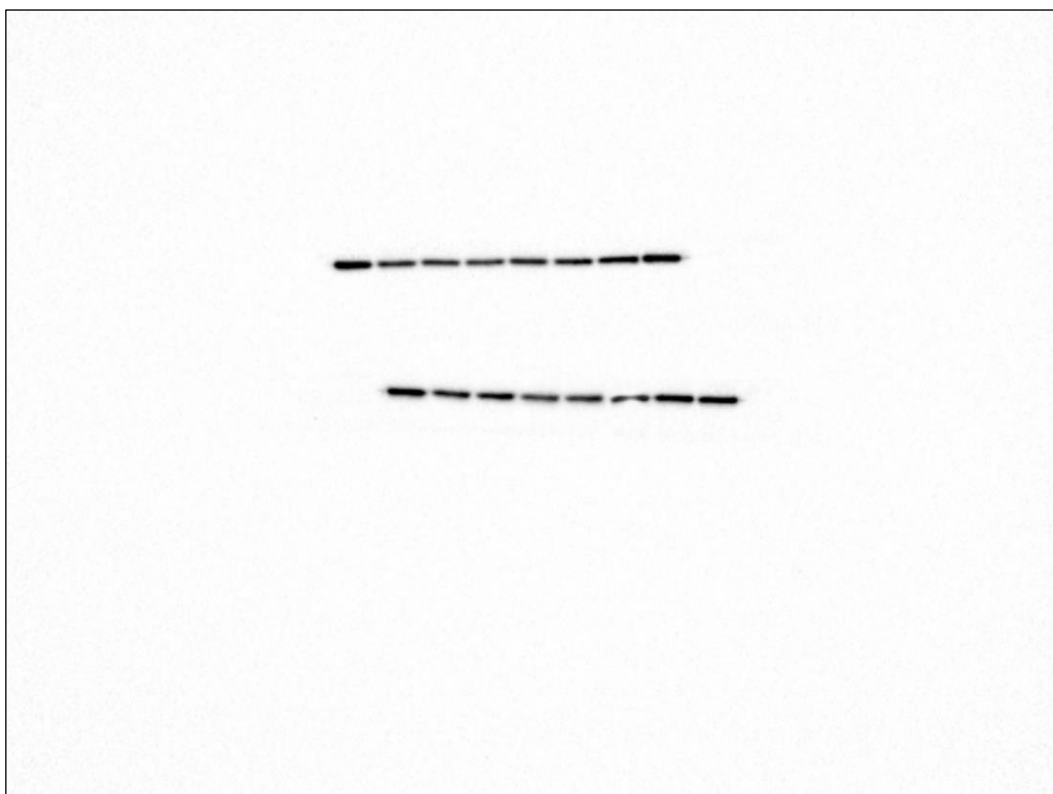

Repeat 1 of ZO-1, upper lanes from left to right: Control, Model, RES 25, 50, 100  $\mu$ M, ALA 25, 50, 100  $\mu$ M; lower lanes from left to right: Control, Model, Arg 0.5, 1.0, 2.0 mM, EPA 12.5, 25, 50  $\mu$ M.

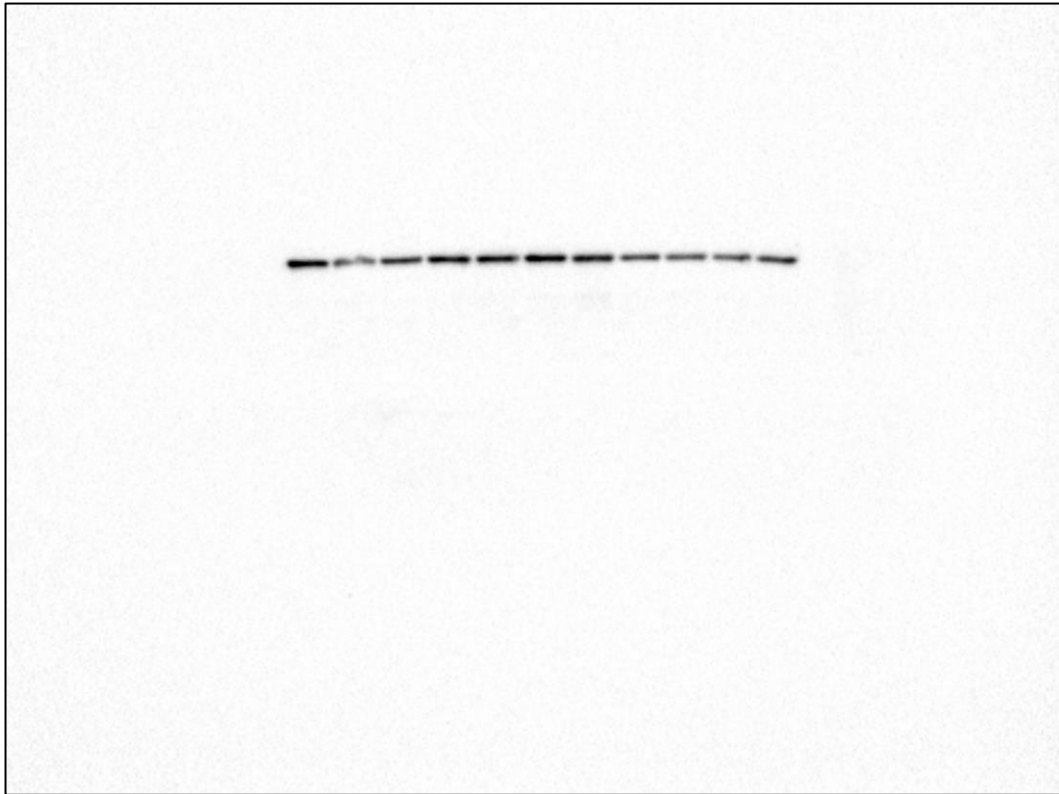

Repeat 2 of ZO-1, lanes from left to right: Control, Model, GOS 2.5, 5, 10 mg/ml, FOS 5, 10, 20 mg/ml, COS 2.5, 5, 10 mg/ml.

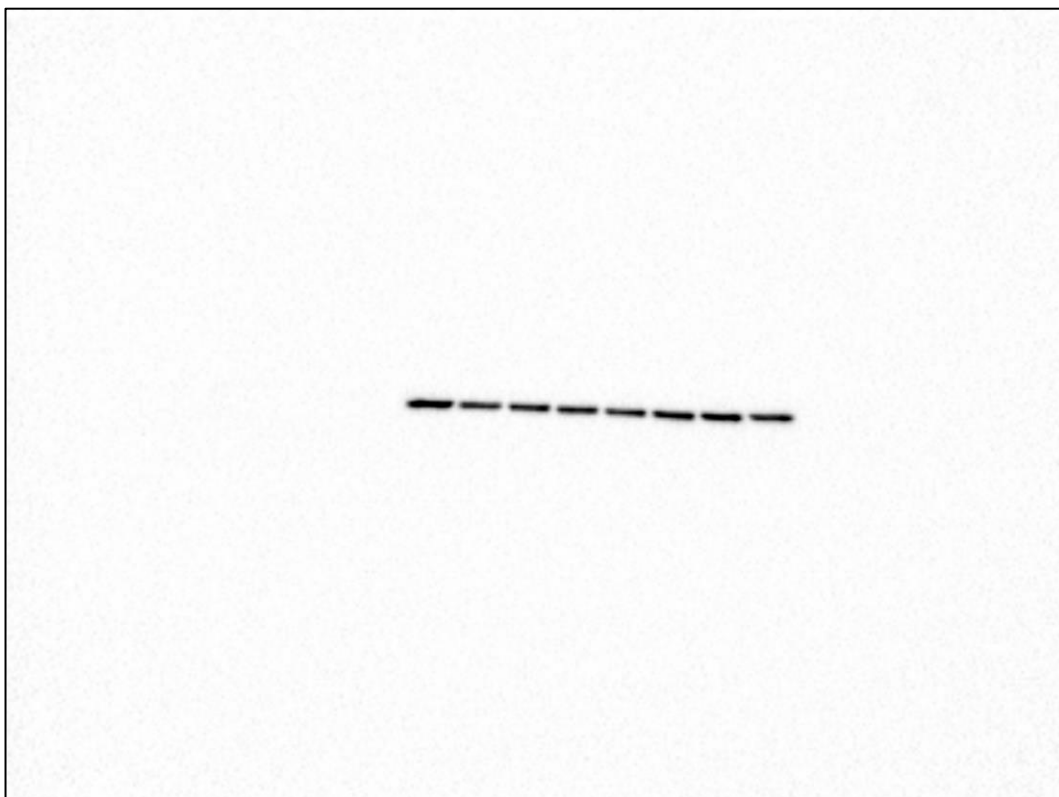

Repeat 2 of ZO-1, lanes from left to right: Control, Model, RES 25, 50, 100  $\mu$ M, ALA 25, 50, 100  $\mu$ M;

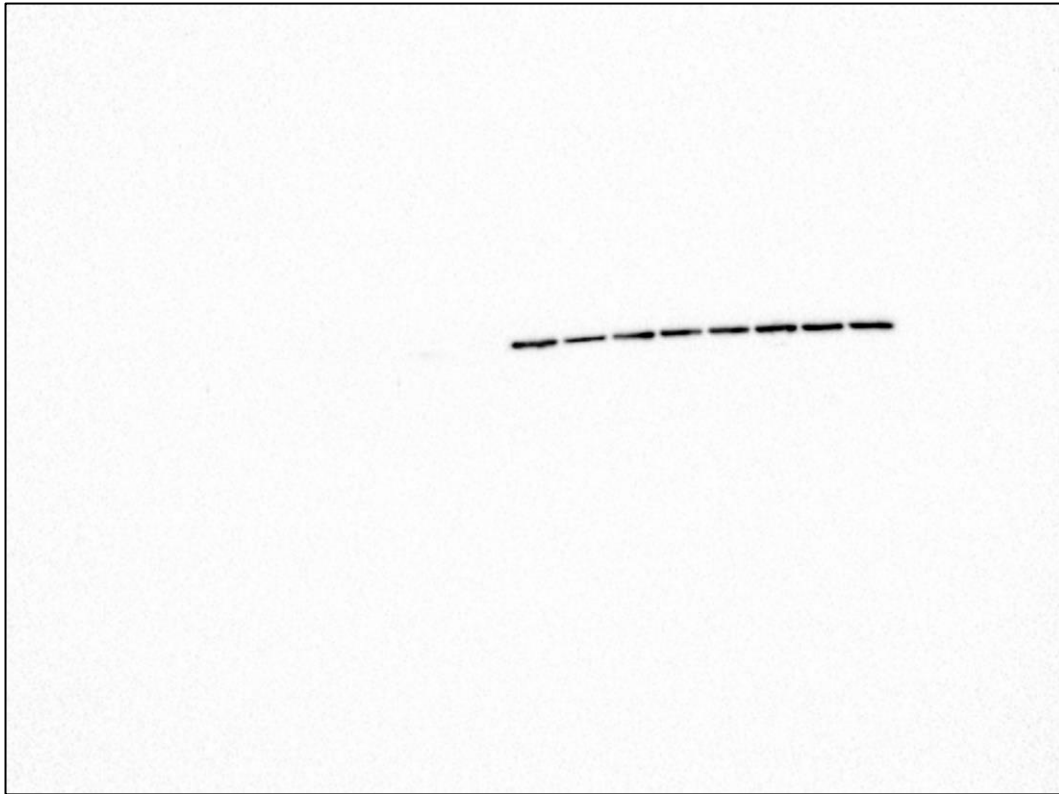

Repeat 2 of ZO-1, lanes from left to right: Control, Model, Arg 0.5, 1.0, 2.0 mM, EPA 12.5, 25, 50  $\mu$ M.

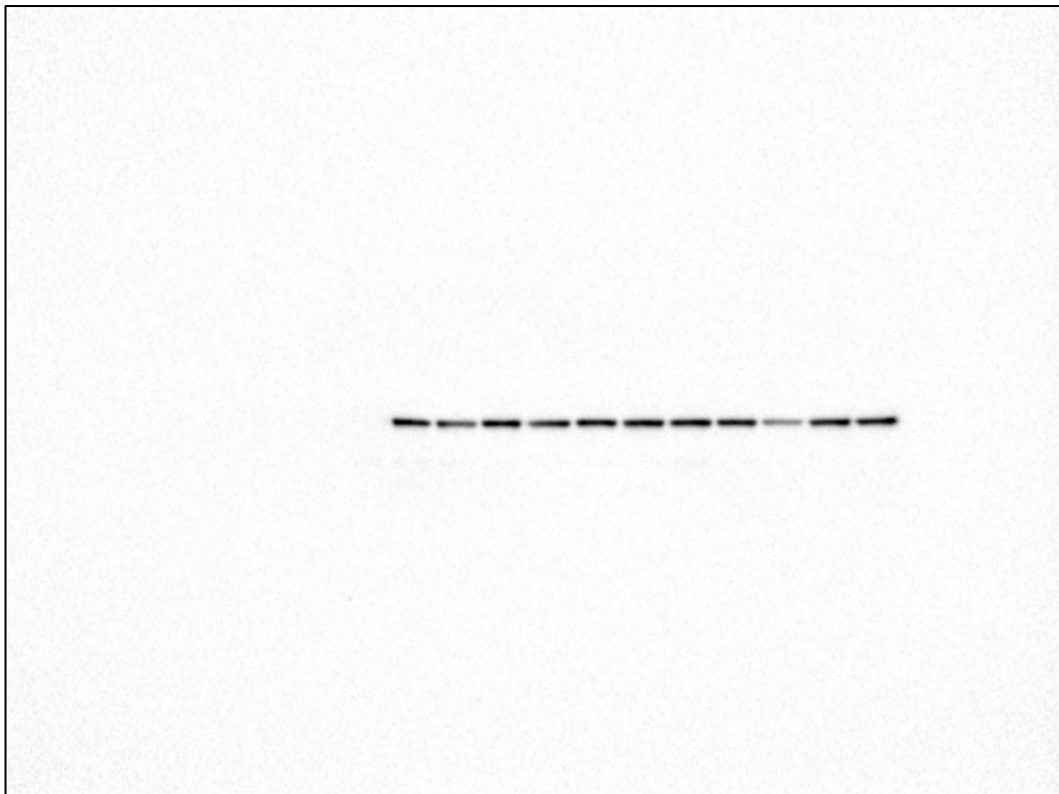

Repeat 3 of ZO-1, lanes from left to right: Control, Model, GOS 2.5, 5, 10 mg/ml, FOS 5, 10, 20 mg/ml, COS 2.5, 5, 10 mg/ml.

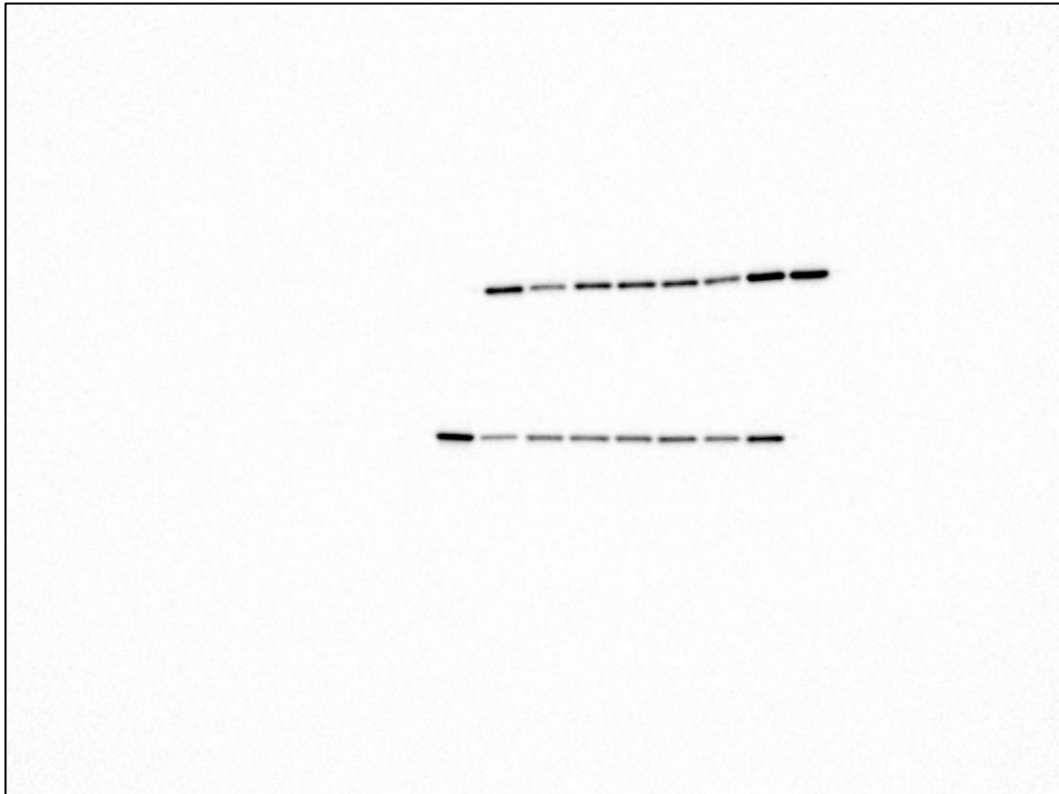

Repeat 3 of ZO-1, upper lanes from left to right: Control, Model, RES 25, 50, 100  $\mu$ M, ALA 25, 50, 100  $\mu$ M; lower lanes from left to right: Control, Model, Arg 0.5, 1.0, 2.0 mM, EPA 12.5, 25, 50  $\mu$ M

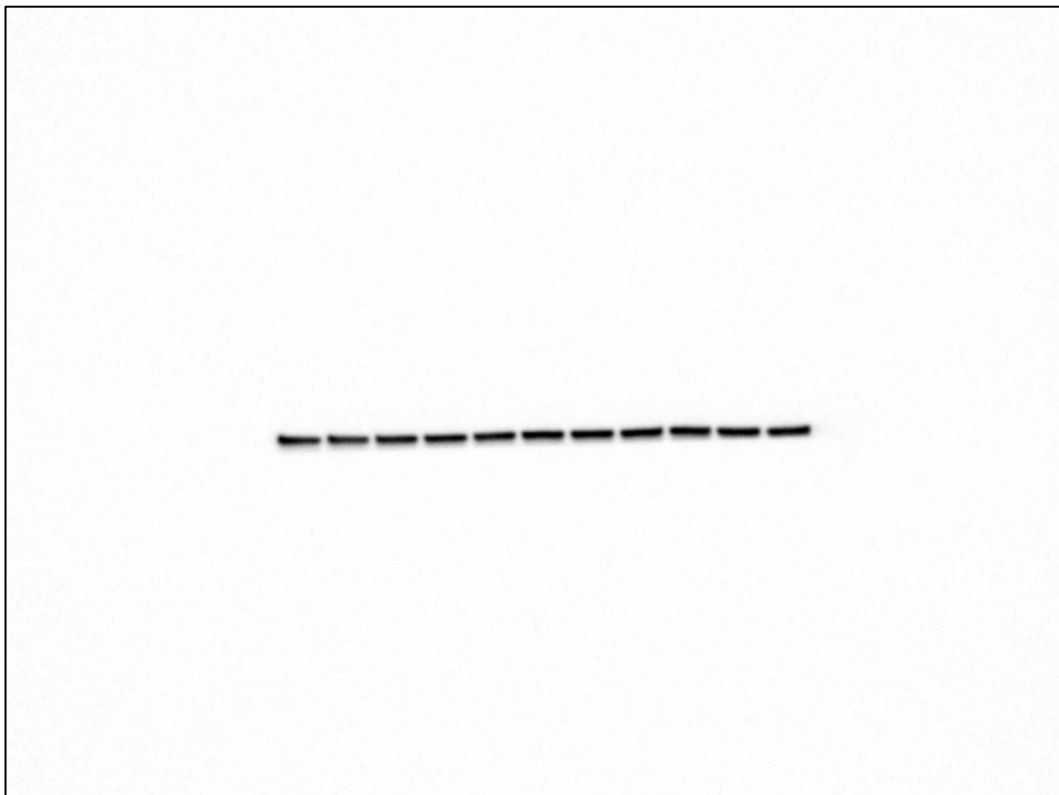

Repeat 1 of  $\beta$ -actin, lanes from left to right: Control, Model, GOS 2.5, 5, 10 mg/ml, FOS 5, 10, 20 mg/ml, COS 2.5, 5, 10 mg/ml.

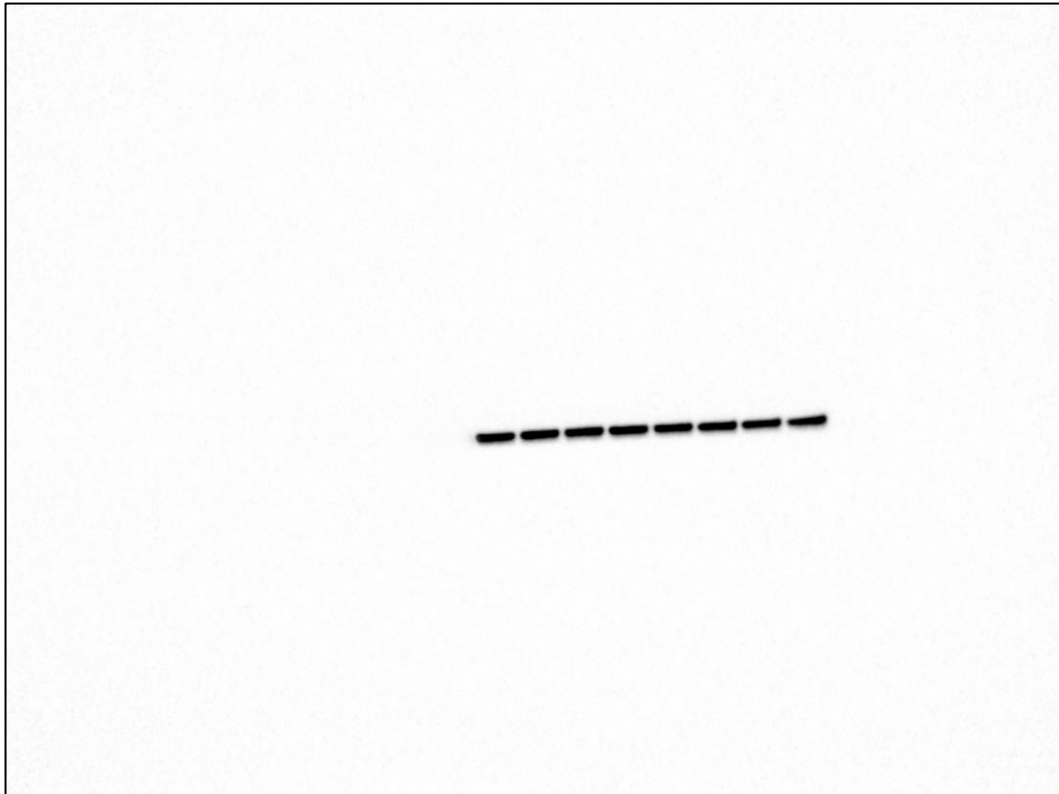

Repeat 1 of  $\beta$ -actin, lanes from left to right: Control, Model, RES 25, 50, 100  $\mu$ M, ALA 25, 50, 100  $\mu$ M.

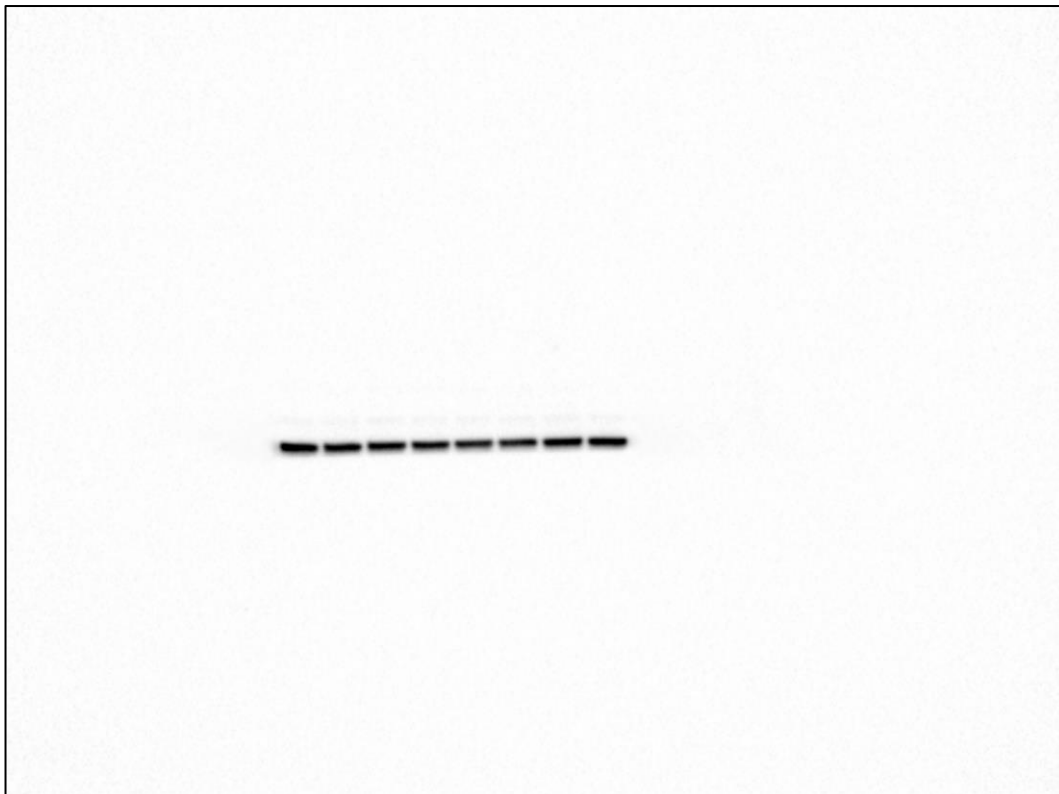

Repeat 1 of  $\beta$ -actin, lanes from left to right: Control, Model, Arg 0.5, 1.0, 2.0 mM, EPA 12.5, 25, 50  $\mu$ M.

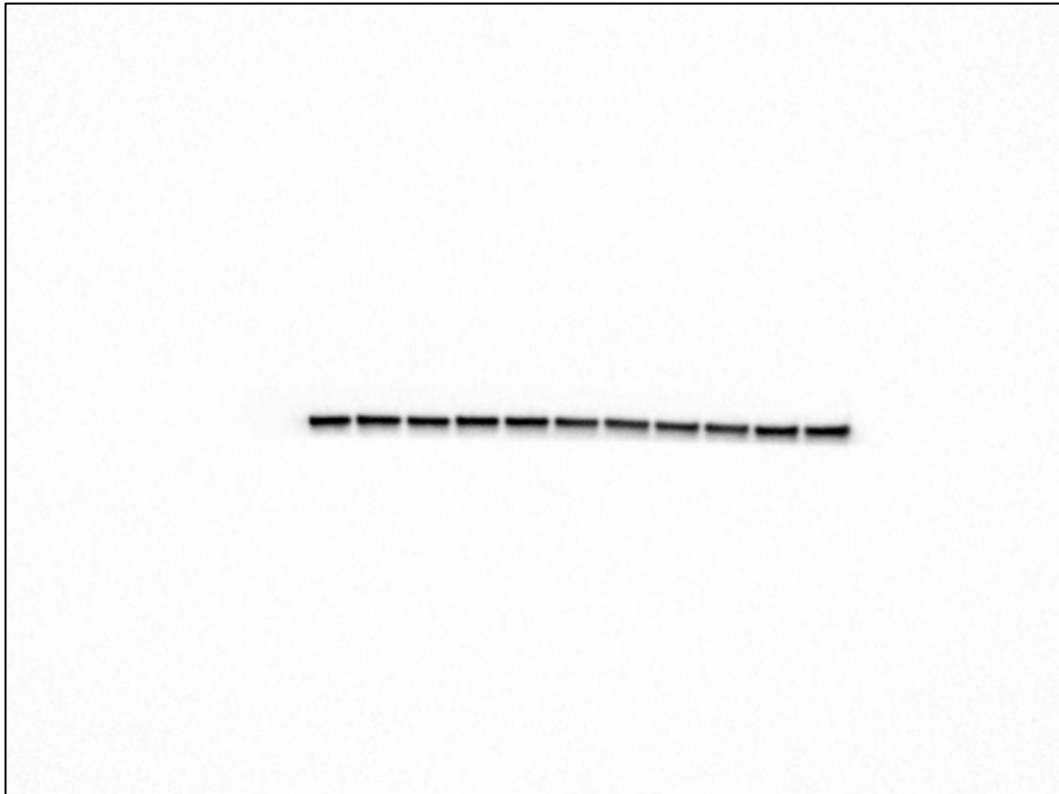

Repeat 2 of  $\beta$ -actin, lanes from left to right: Control, Model, GOS 2.5, 5, 10 mg/ml, FOS 5, 10, 20 mg/ml, COS 2.5, 5, 10 mg/ml.

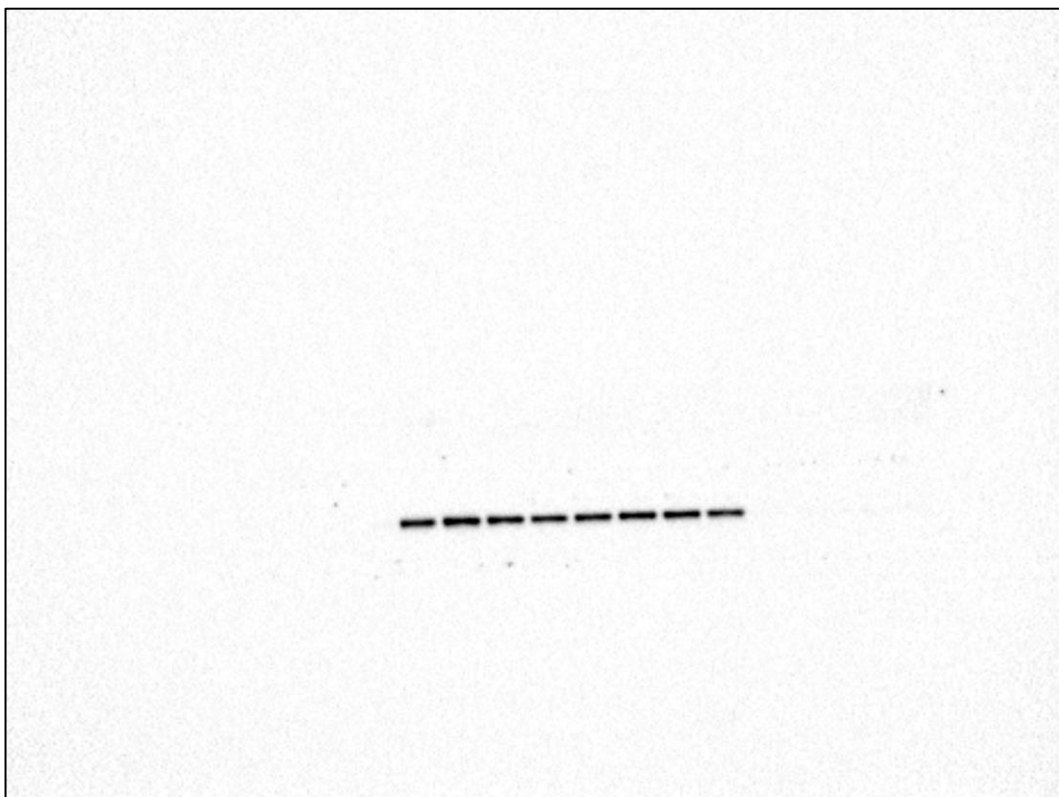

Repeat 2 of  $\beta$ -actin, lanes from left to right: Control, Model, RES 25, 50, 100  $\mu$ M, ALA 25, 50, 100  $\mu$ M.

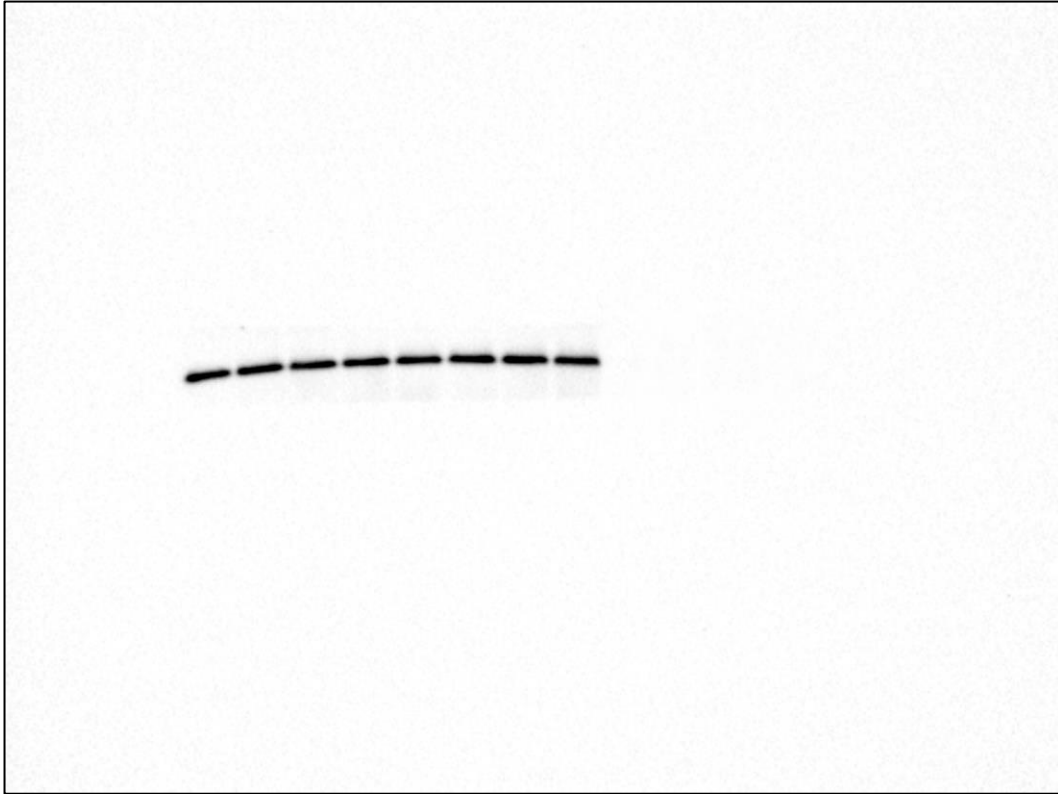

Repeat 2 of  $\beta$ -actin, lanes from left to right: Control, Model, Arg 0.5, 1.0, 2.0 mM, EPA 12.5, 25, 50  $\mu$ M.

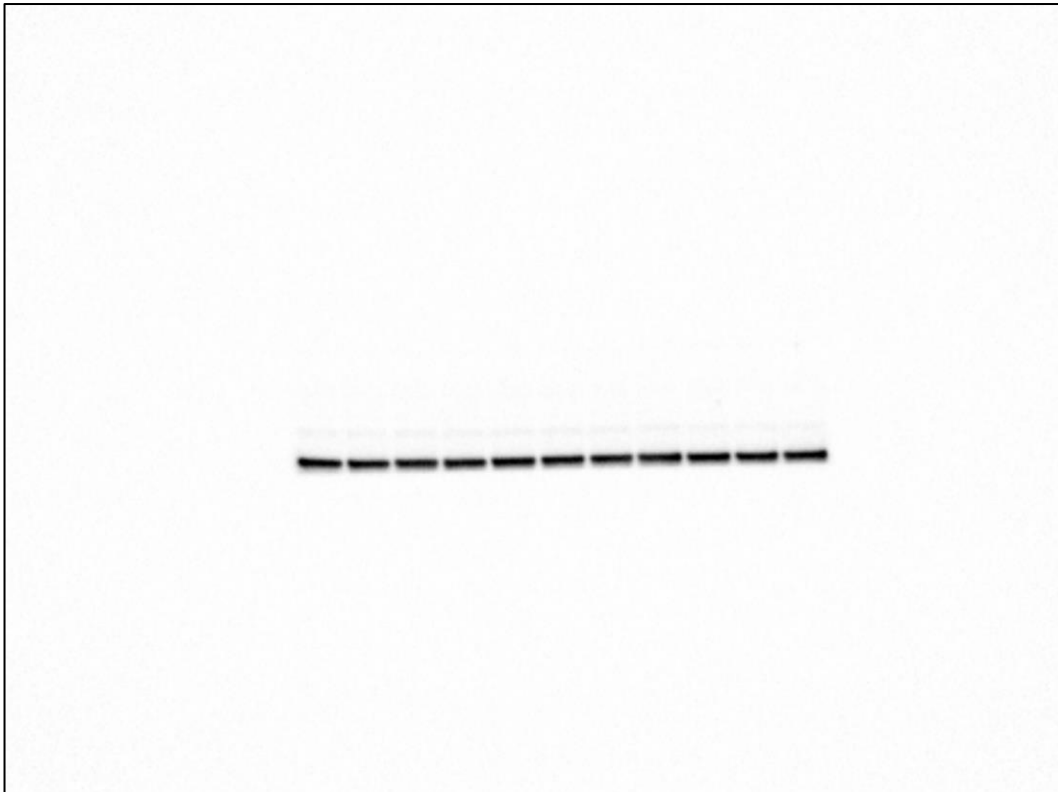

Repeat 3 of  $\beta$ -actin, lanes from left to right: Control, Model, GOS 2.5, 5, 10 mg/ml, FOS 5, 10, 20 mg/ml, COS 2.5, 5, 10 mg/ml.



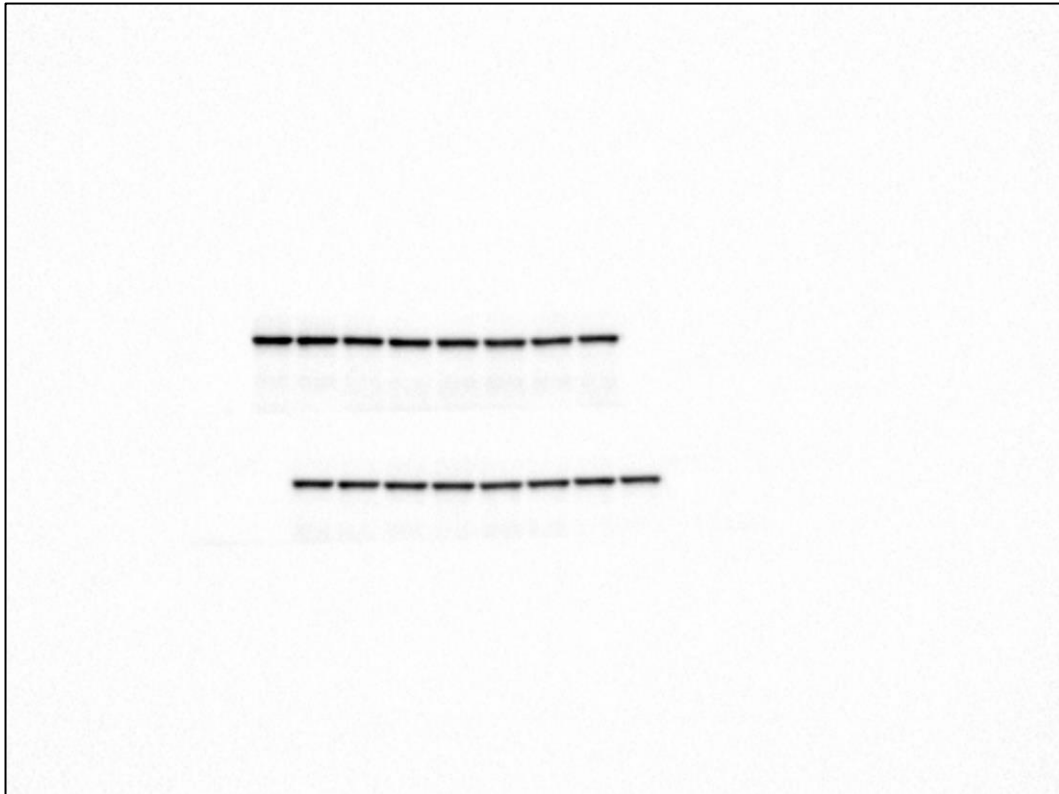

Repeat 3 of  $\beta$ -actin, upper lanes from left to right: Control, Model, RES 25, 50, 100  $\mu$ M, ALA 25, 50, 100  $\mu$ M; lower lanes from left to right: Control, Model, Arg 0.5, 1.0, 2.0 mM, EPA 12.5, 25, 50  $\mu$ M.

**Original blot images supporting Figure 5:**

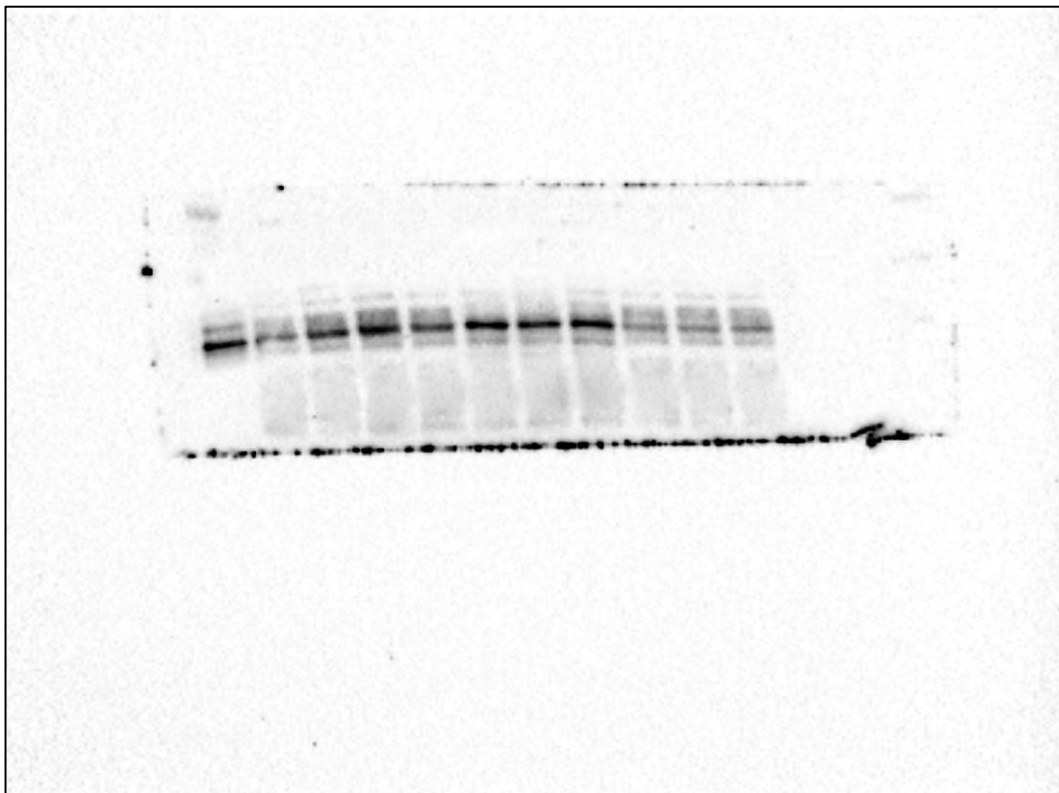

Repeat 1 of CLDN3, lanes from left to right: Control, Model, GOS 2.5, 5, 10 mg/ml, FOS 5, 10, 20 mg/ml, COS 2.5, 5, 10 mg/ml.

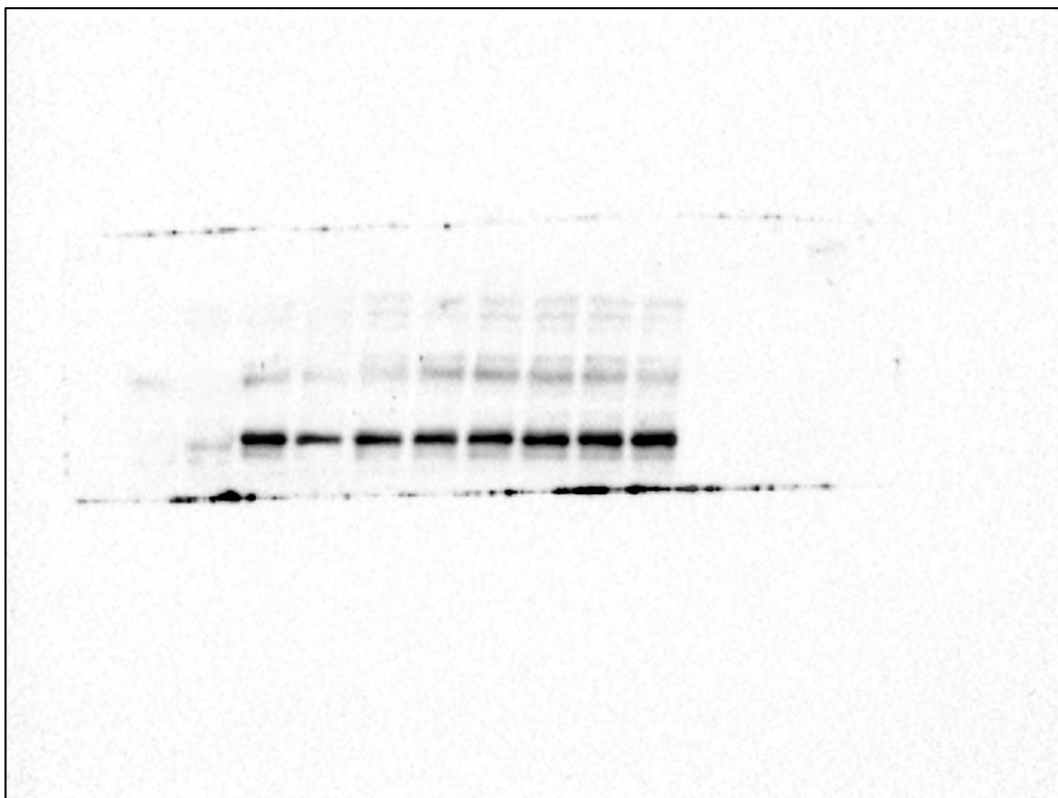

Repeat 1 of CLDN3, lanes from left to right: Control, Model, RES 25, 50, 100  $\mu$ M, ALA 25, 50, 100  $\mu$ M.

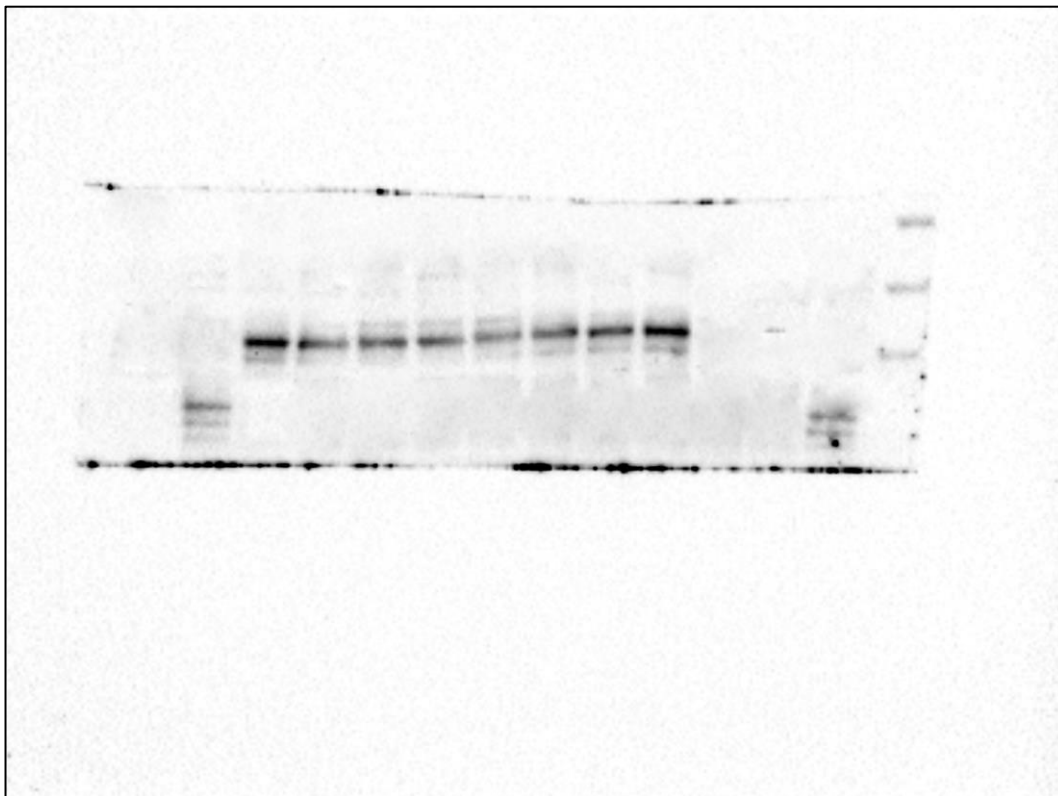

Repeat 1 of CLDN3, lanes from left to right: Control, Model, Arg 0.5, 1.0, 2.0 mM, EPA 12.5, 25, 50  $\mu$ M.

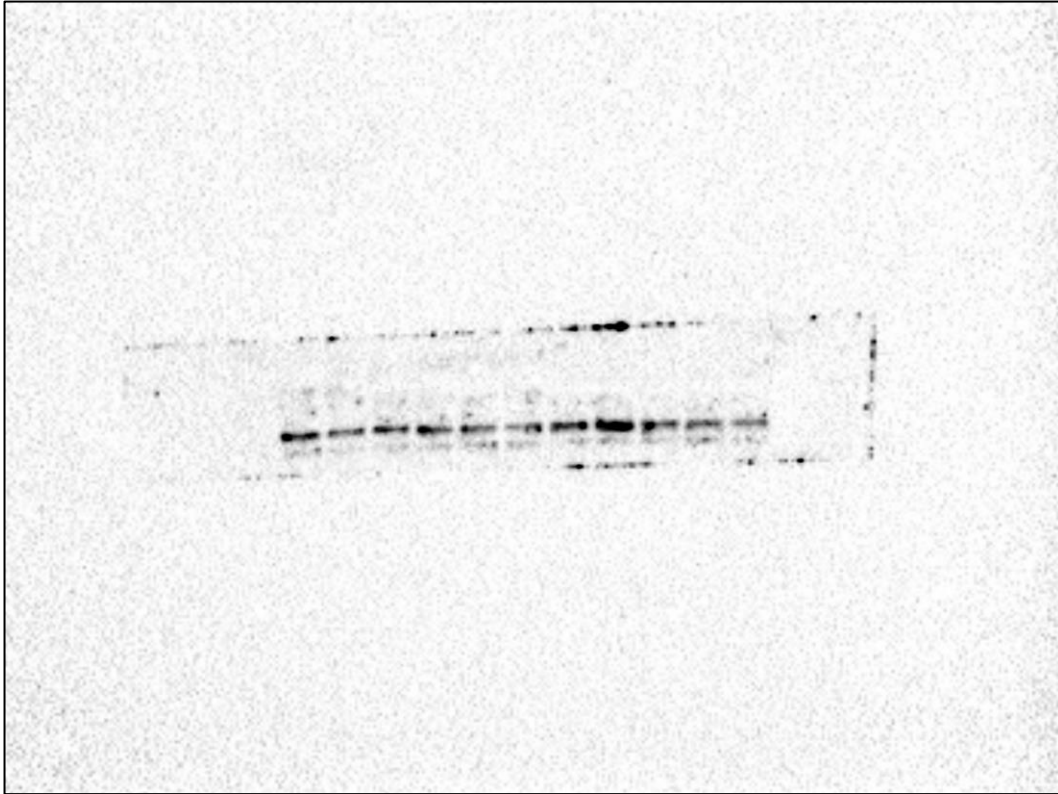

Repeat 2 of CLDN3, lanes from left to right: Control, Model, GOS 2.5, 5, 10 mg/ml, FOS 5, 10, 20 mg/ml, COS 2.5, 5, 10 mg/ml.

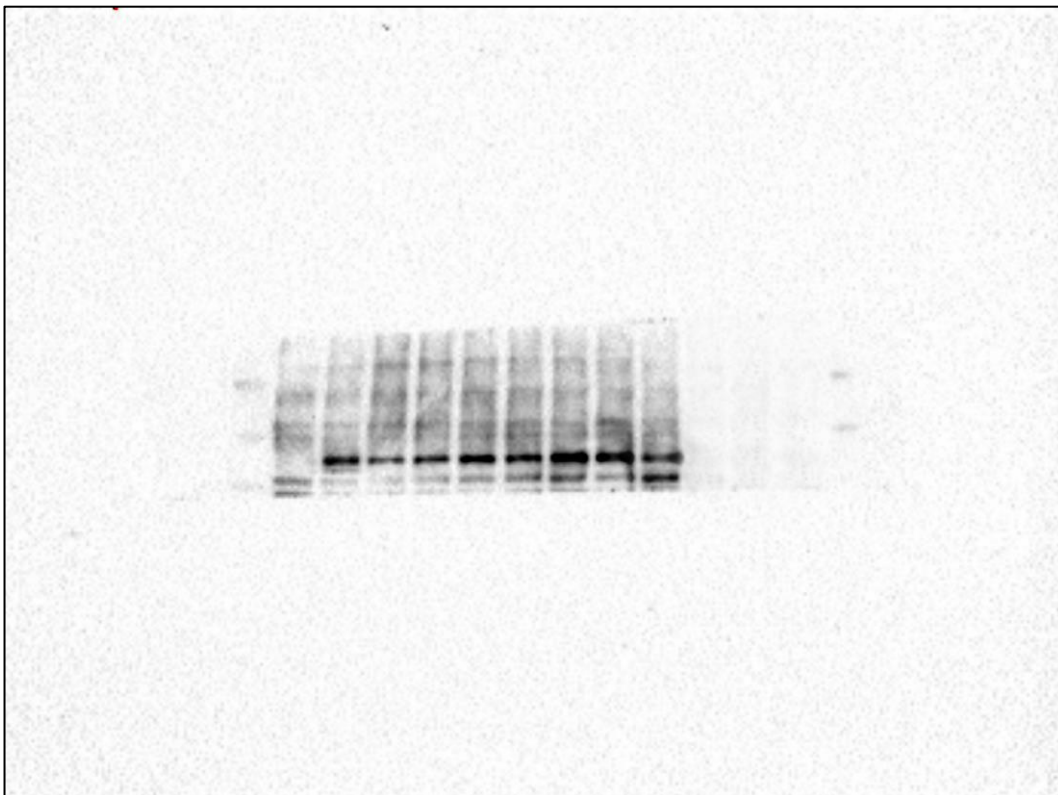

Repeat 2 of CLDN3, lanes from left to right: Control, Model, RES 25, 50, 100 µM, ALA 25, 50, 100 µM.

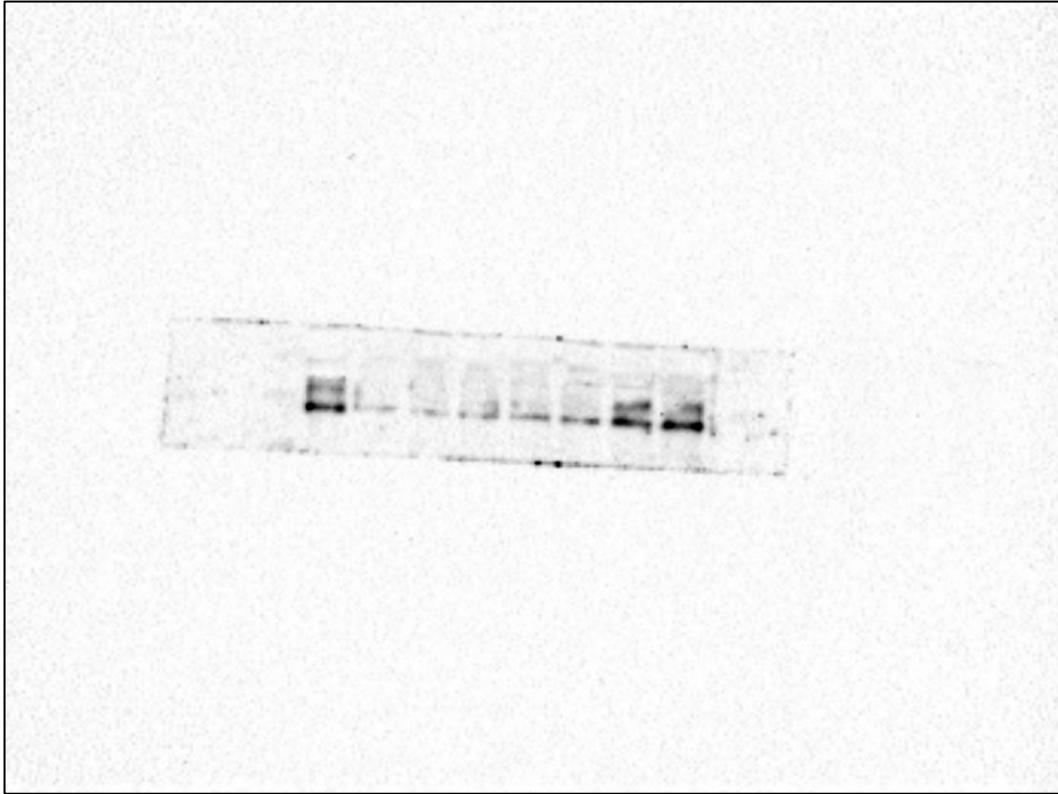

Repeat 2 of CLDN3, lanes from left to right: Control, Model, Arg 0.5, 1.0, 2.0 mM, EPA 12.5, 25, 50 µM.

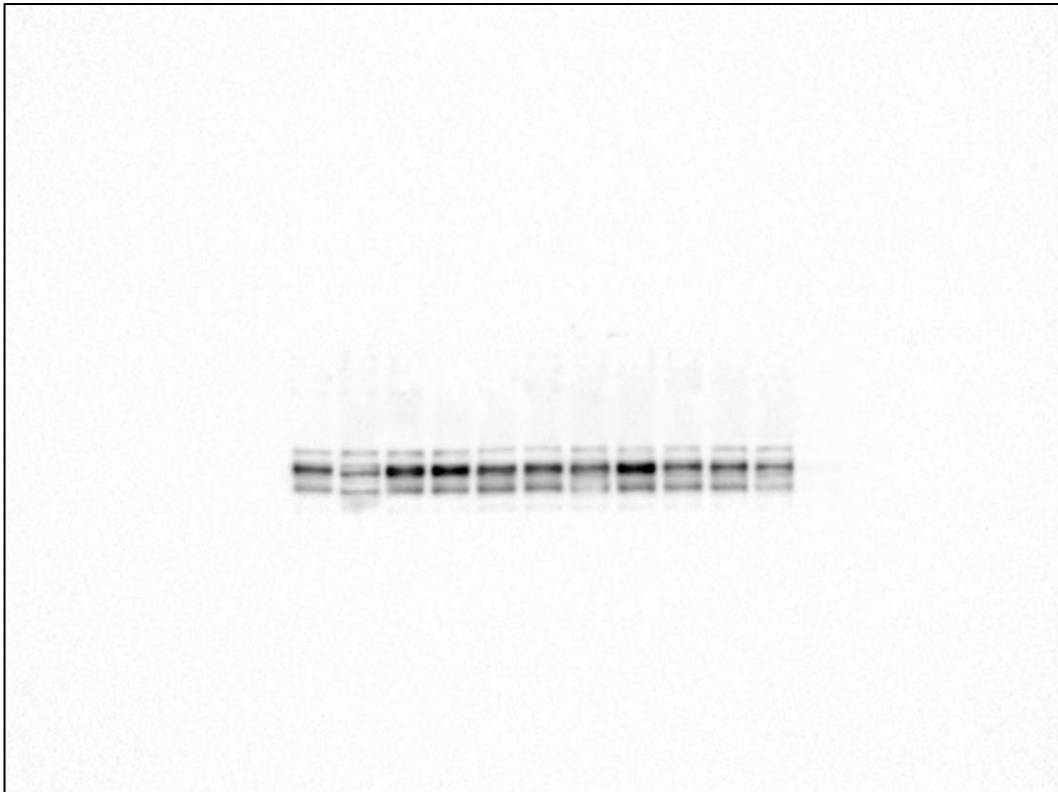

Repeat 3 of CLDN3, lanes from left to right: Control, Model, GOS 2.5, 5, 10 mg/ml, FOS 5, 10, 20 mg/ml, COS 2.5, 5, 10 mg/ml.

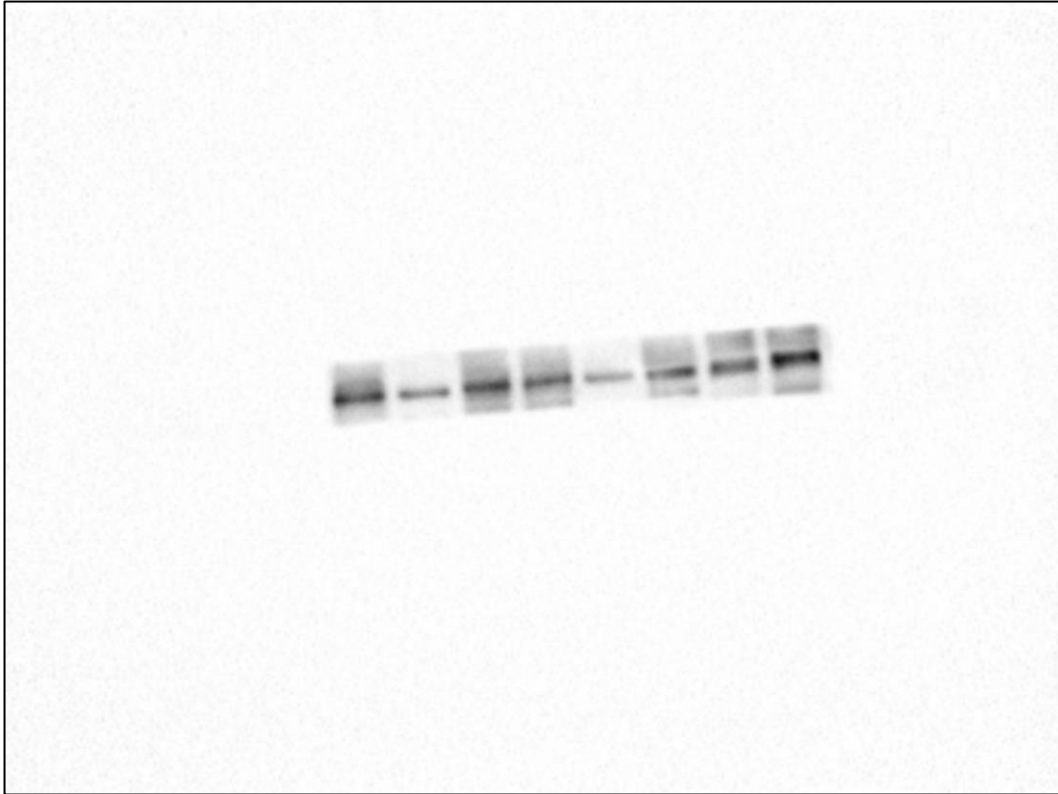

Repeat 3 of CLDN3, lanes from left to right: Control, Model, RES 25, 50, 100  $\mu$ M, ALA 25, 50, 100  $\mu$ M.

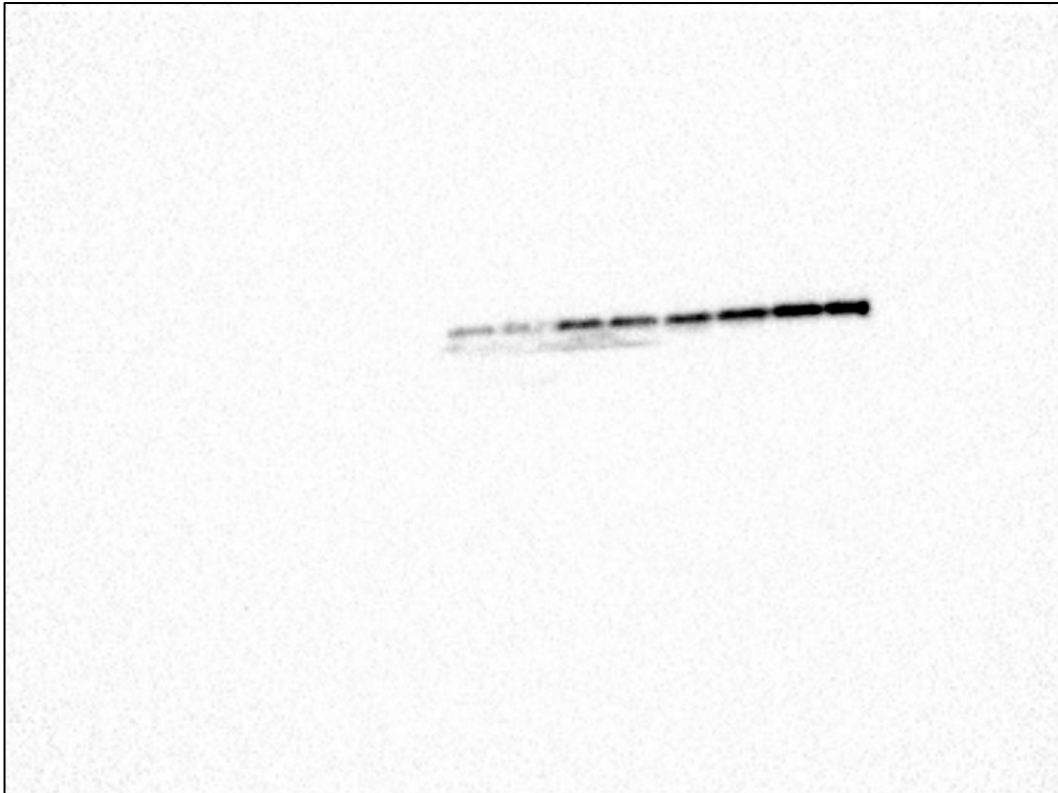

Repeat 3 of CLDN3, lanes from left to right: Control, Model, Arg 0.5, 1.0, 2.0 mM, EPA 12.5, 25, 50  $\mu$ M.

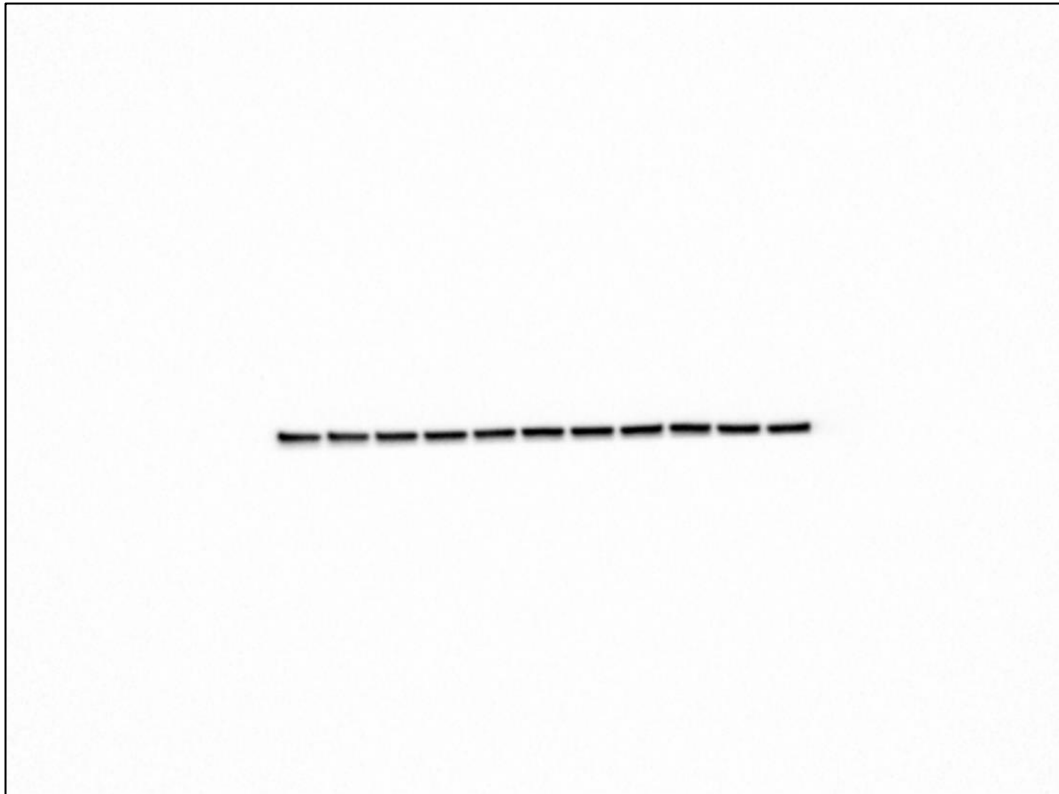

Repeat 1 of  $\beta$ -actin, lanes from left to right: Control, Model, GOS 2.5, 5, 10 mg/ml, FOS 5, 10, 20 mg/ml, COS 2.5, 5, 10 mg/ml.

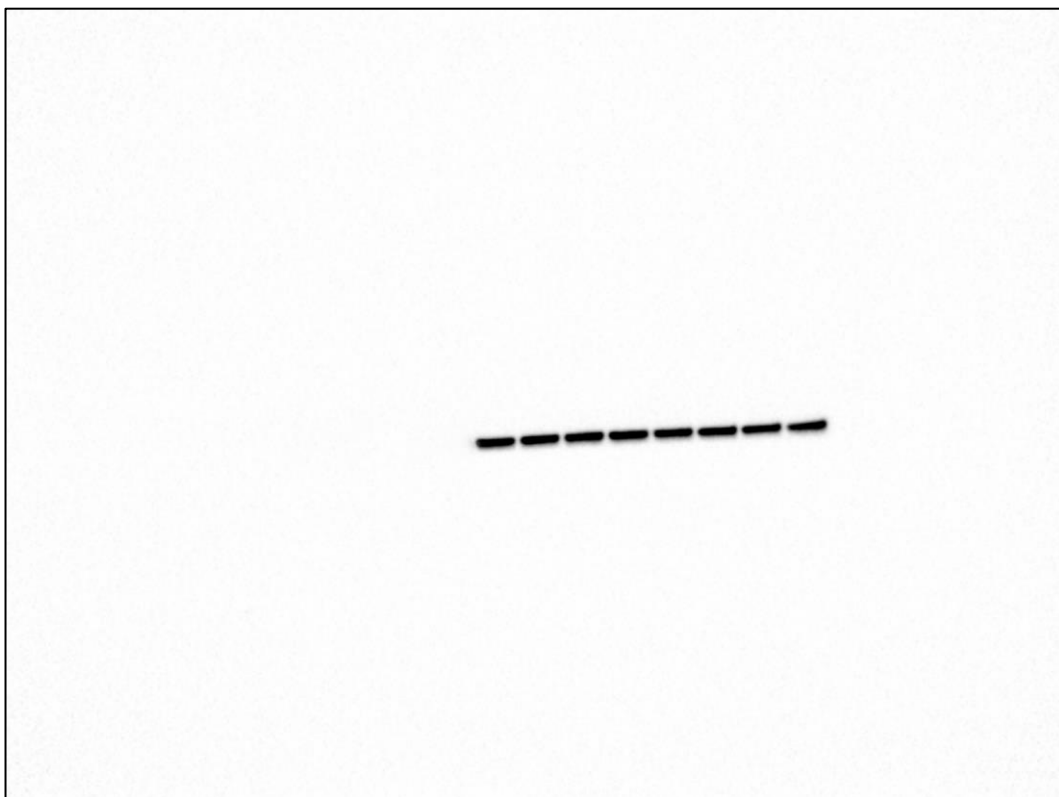

Repeat 1 of  $\beta$ -actin, lanes from left to right: Control, Model, RES 25, 50, 100  $\mu$ M, ALA 25, 50, 100  $\mu$ M.

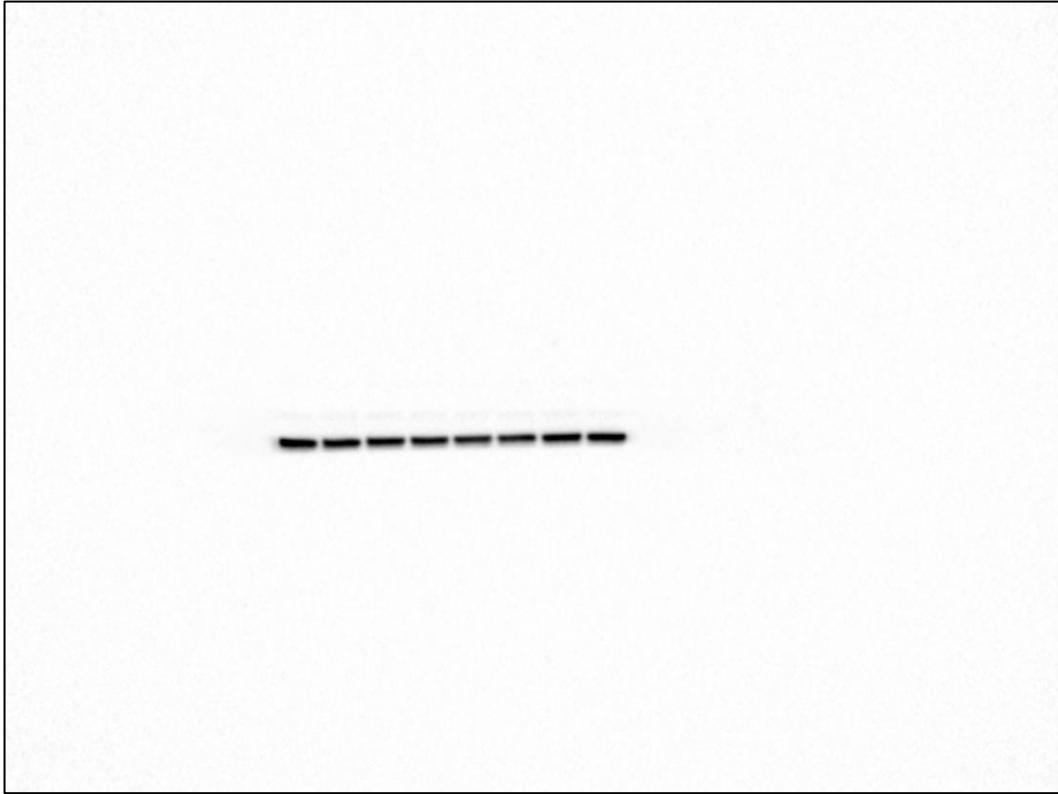

Repeat 1 of  $\beta$ -actin, lanes from left to right: Control, Model, Arg 0.5, 1.0, 2.0 mM, EPA 12.5, 25, 50  $\mu$ M.

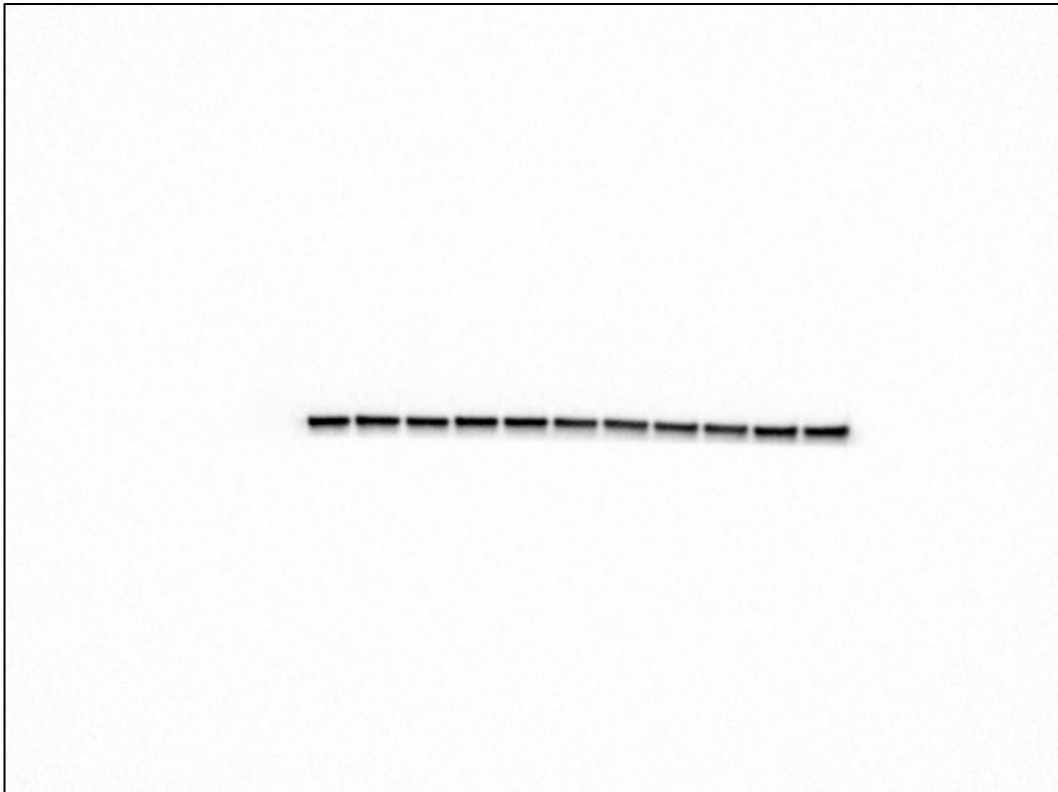

Repeat 2 of  $\beta$ -actin, lanes from left to right: Control, Model, GOS 2.5, 5, 10 mg/ml, FOS 5, 10, 20 mg/ml, COS 2.5, 5, 10 mg/ml.



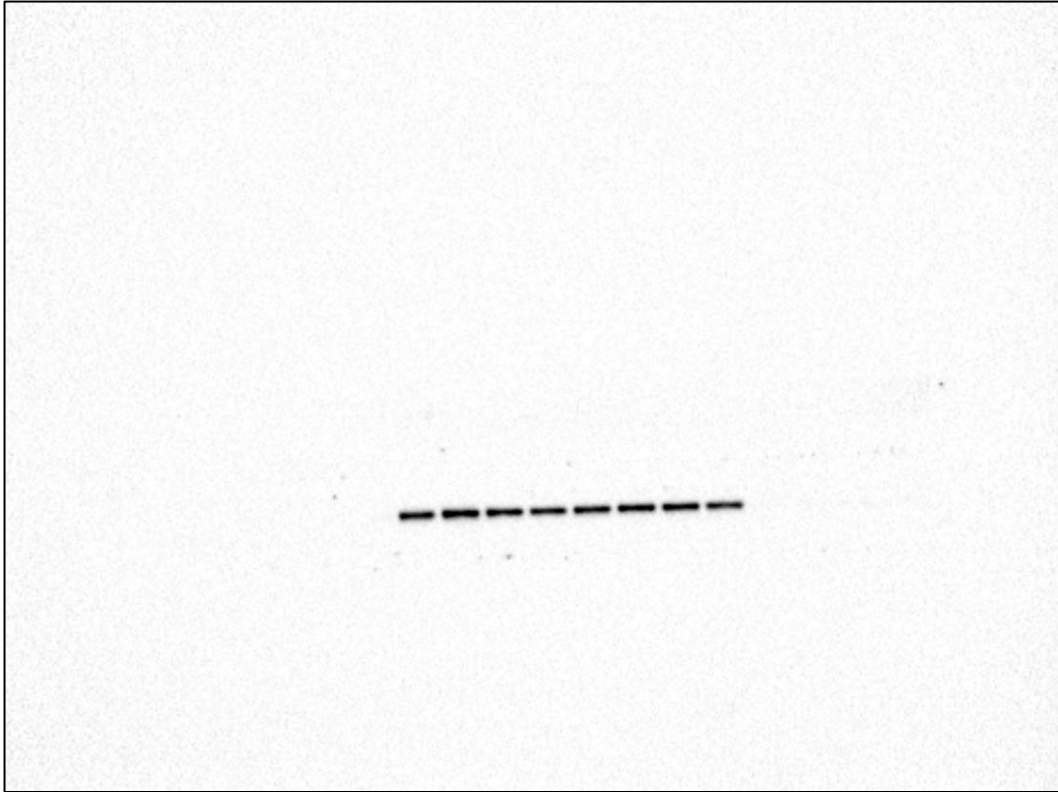

Repeat 2 of  $\beta$ -actin, lanes from left to right: Control, Model, RES 25, 50, 100  $\mu$ M, ALA 25, 50, 100  $\mu$ M.

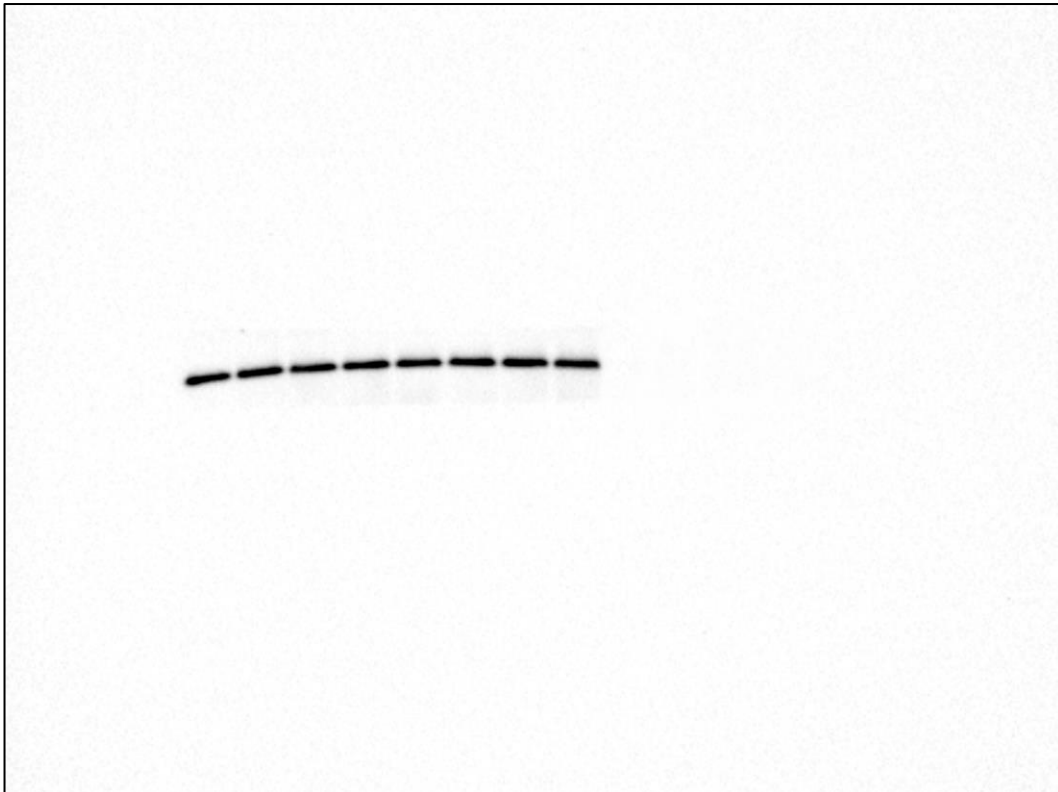

Repeat 2 of  $\beta$ -actin, lanes from left to right: Control, Model, Arg 0.5, 1.0, 2.0 mM, EPA 12.5, 25, 50  $\mu$ M.



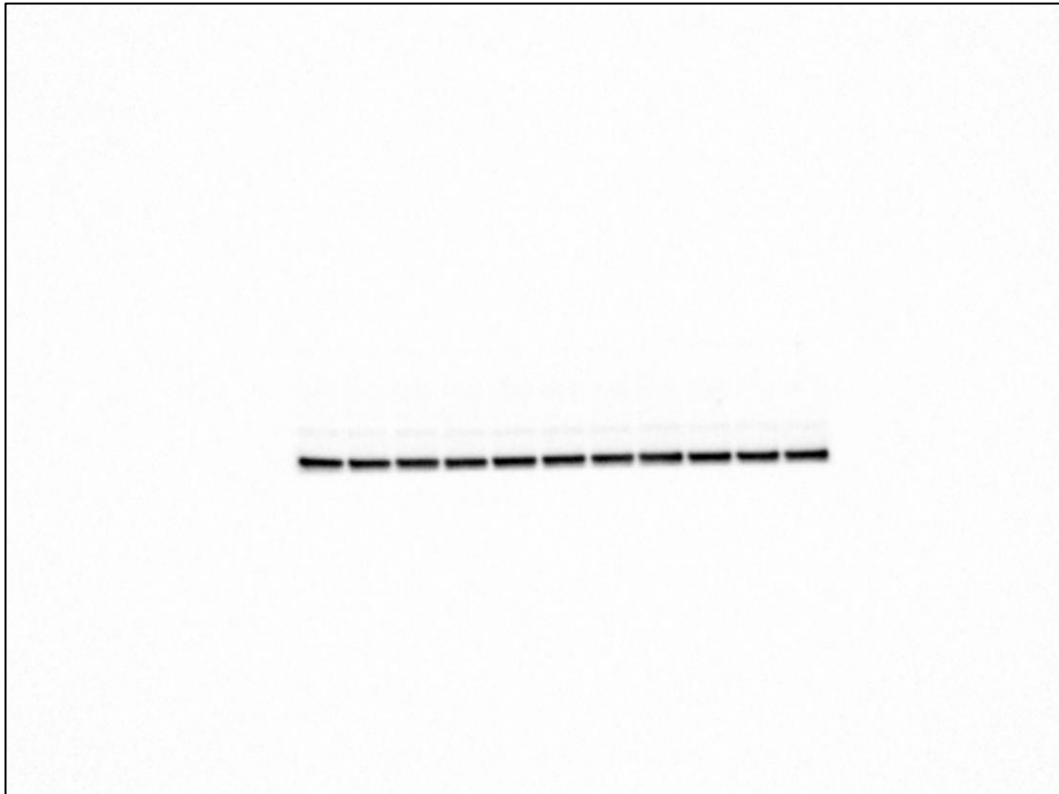

Repeat 3 of  $\beta$ -actin, lanes from left to right: Control, Model, GOS 2.5, 5, 10 mg/ml, FOS 5, 10, 20 mg/ml, COS 2.5, 5, 10 mg/ml.

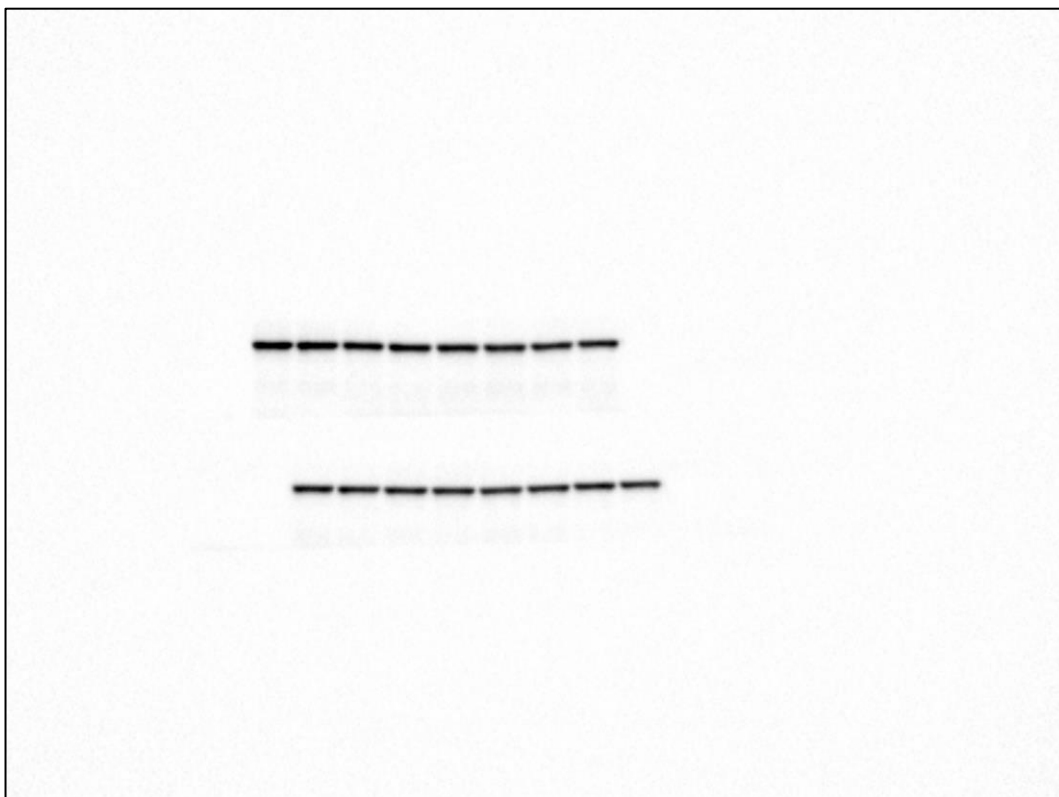

Repeat 3 of  $\beta$ -actin, upper lanes from left to right: Control, Model, RES 25, 50, 100  $\mu$ M, ALA 25, 50, 100  $\mu$ M; lower lanes from left to right: Control, Model, Arg 0.5, 1.0, 2.0 mM, EPA 12.5, 25, 50  $\mu$ M.

**Original blot images supporting Figure 7:**

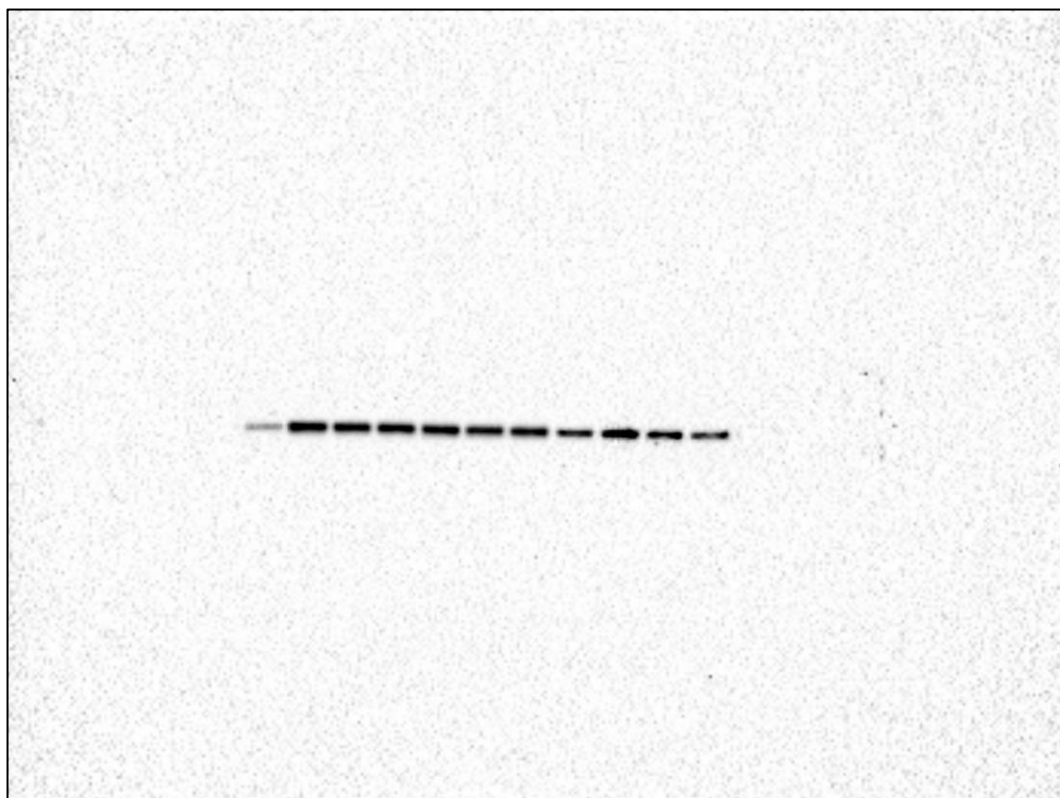

Repeat 1 of HSP-70, lanes from left to right: Control, Model, GOS 2.5, 5, 10 mg/ml, FOS 5, 10, 20 mg/ml, COS 2.5, 5, 10 mg/ml.

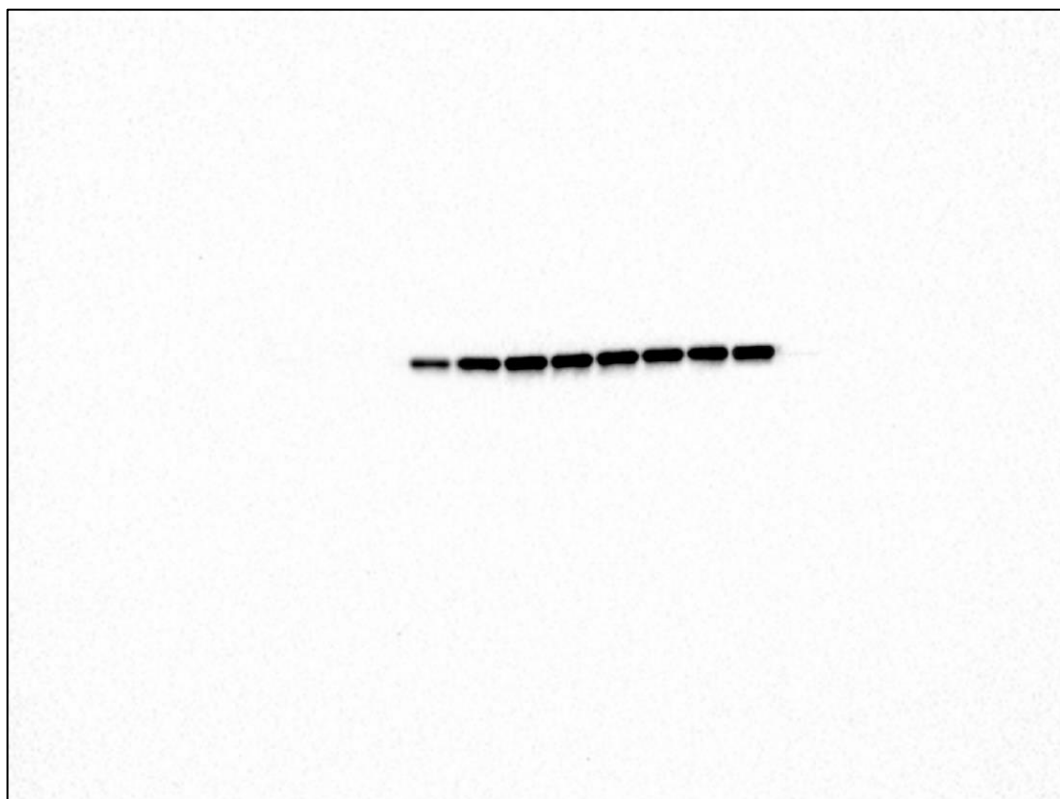

Repeat 1 of HSP-70, lanes from left to right: Control, Model, RES 25, 50, 100  $\mu$ M, ALA 25, 50, 100  $\mu$ M.

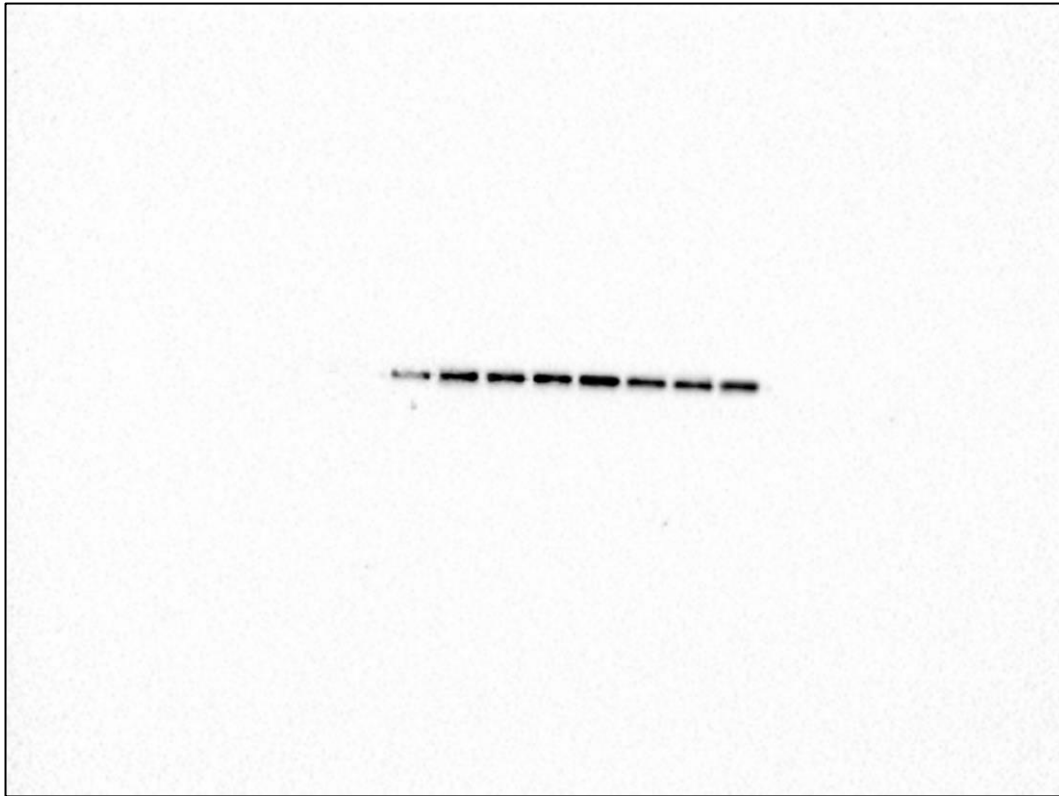

Repeat 1 of HSP-70, lanes from left to right: Control, Model, Arg 0.5, 1.0, 2.0 mM, EPA 12.5, 25, 50  $\mu$ M.

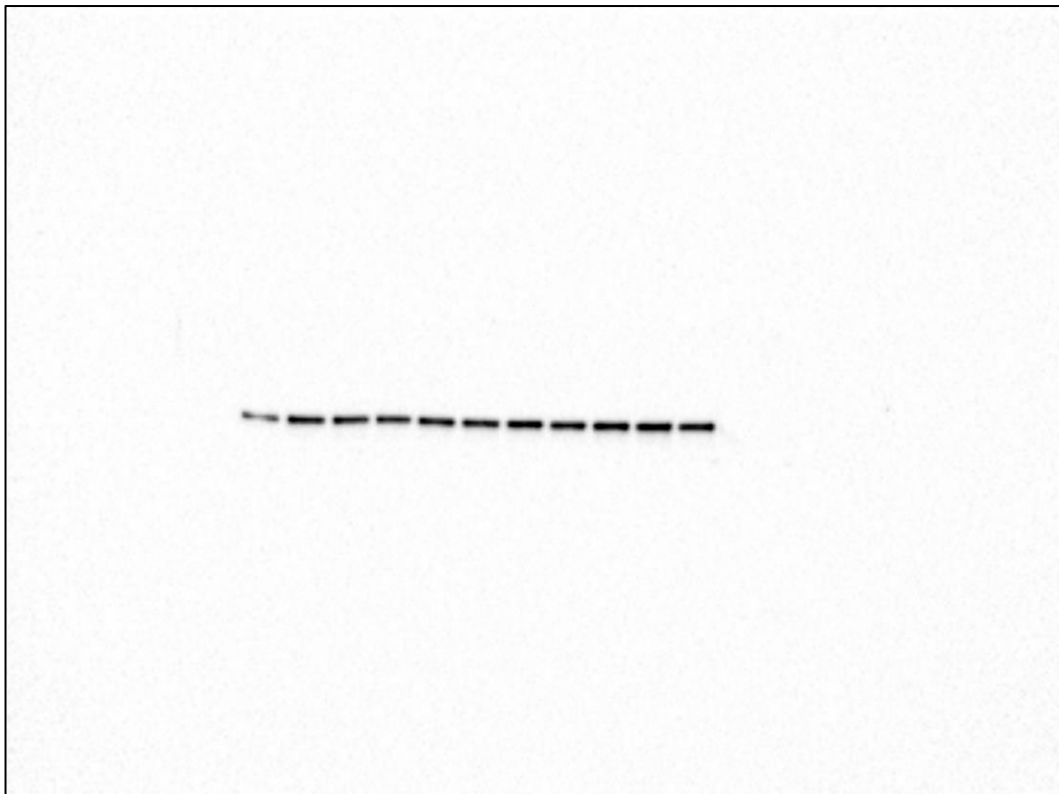

Repeat 2 of HSP-70, lanes from left to right: Control, Model, GOS 2.5, 5, 10 mg/ml, FOS 5, 10, 20 mg/ml, COS 2.5, 5, 10 mg/ml.

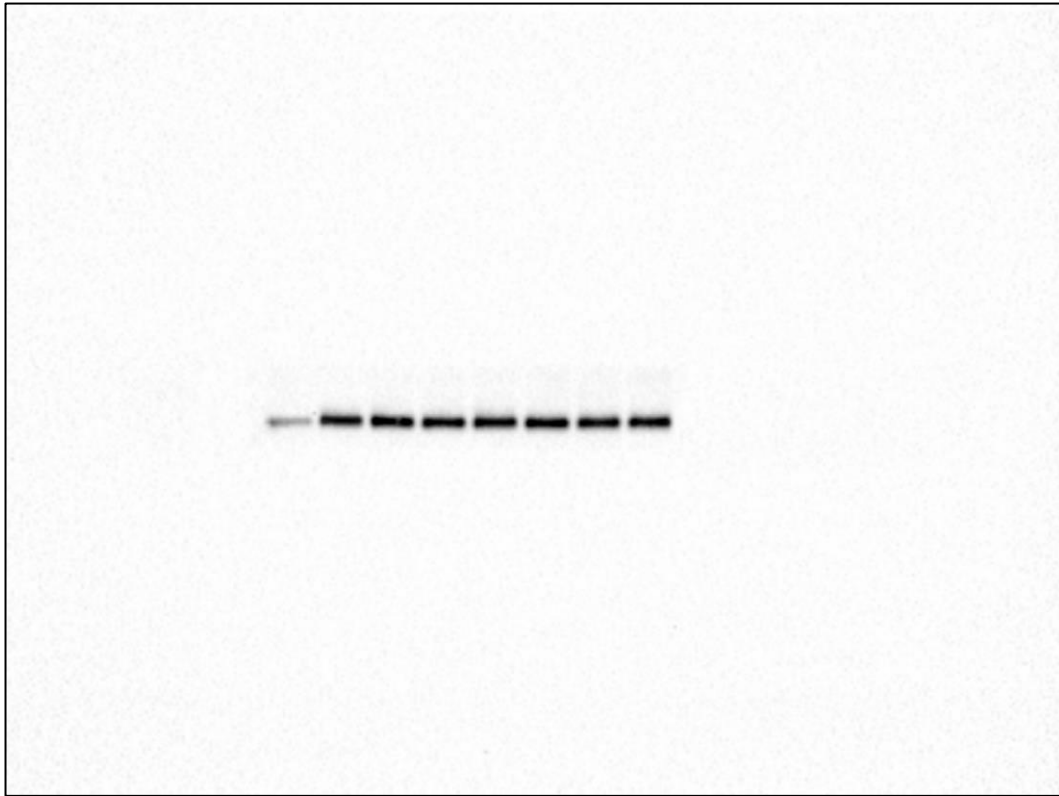

Repeat 2 of HSP-70, lanes from left to right: Control, Model, RES 25, 50, 100  $\mu$ M, ALA 25, 50, 100  $\mu$ M.

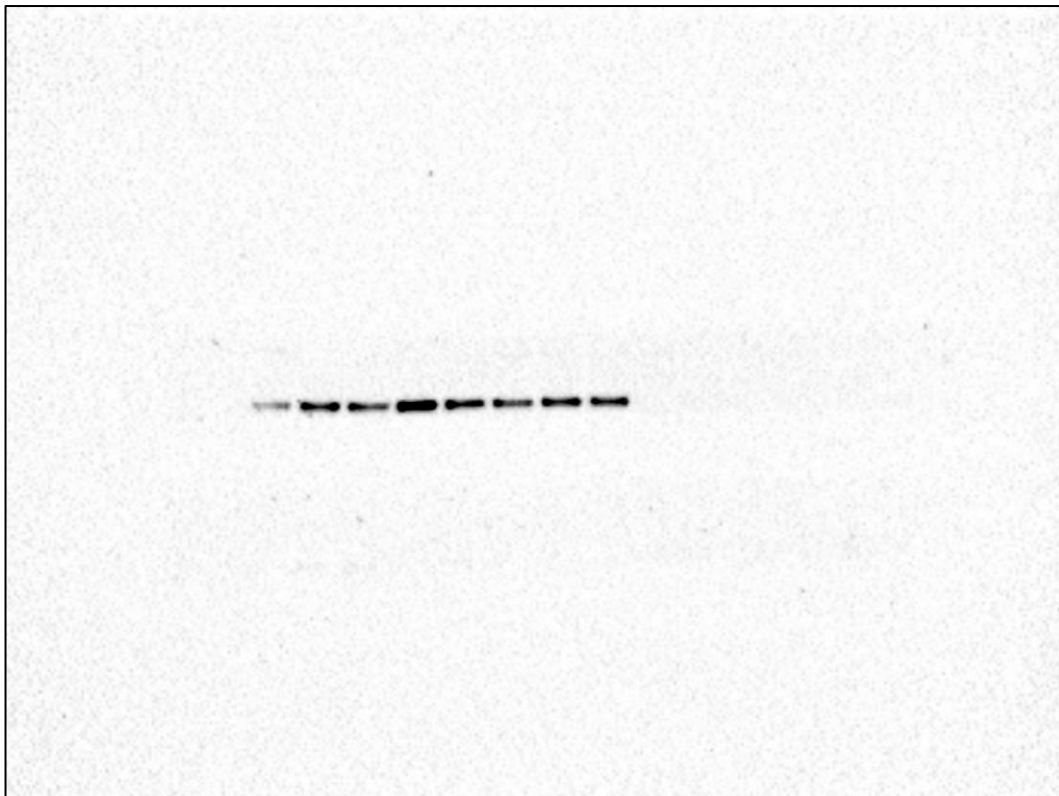

Repeat 2 of HSP-70, lanes from left to right: Control, Model, Arg 0.5, 1.0, 2.0 mM, EPA 12.5, 25, 50  $\mu$ M.

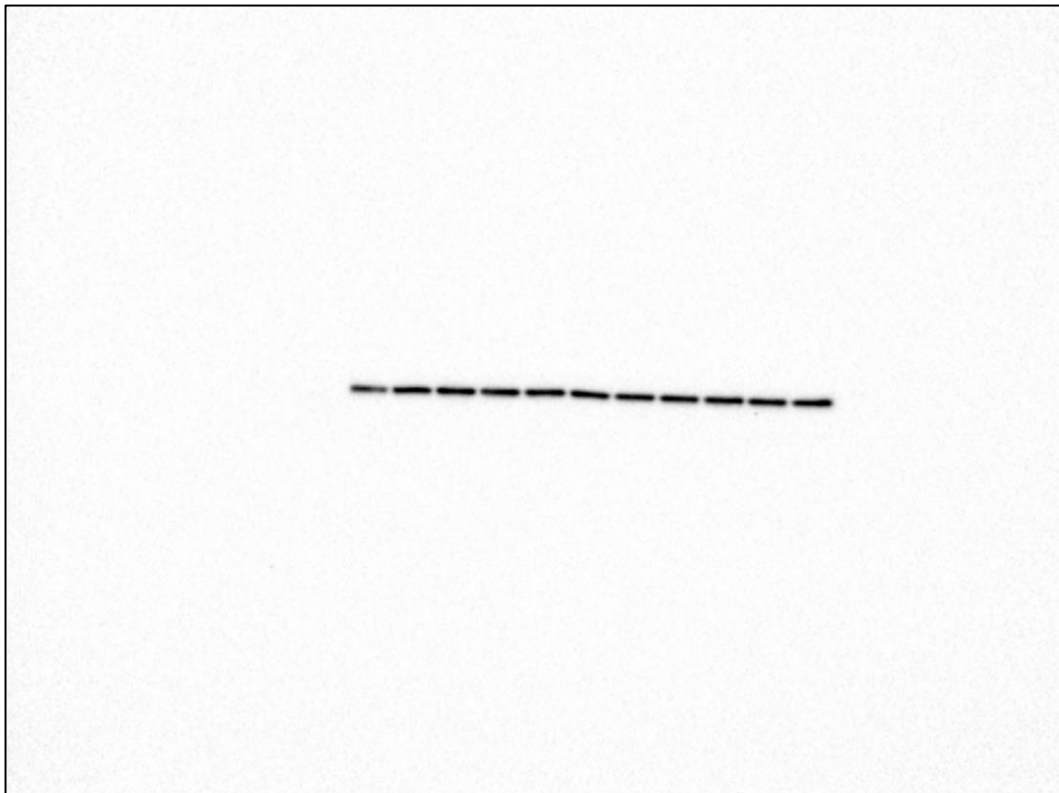

Repeat 3 of HSP-70, lanes from left to right: Control, Model, GOS 2.5, 5, 10 mg/ml, FOS 5, 10, 20 mg/ml, COS 2.5, 5, 10 mg/ml.

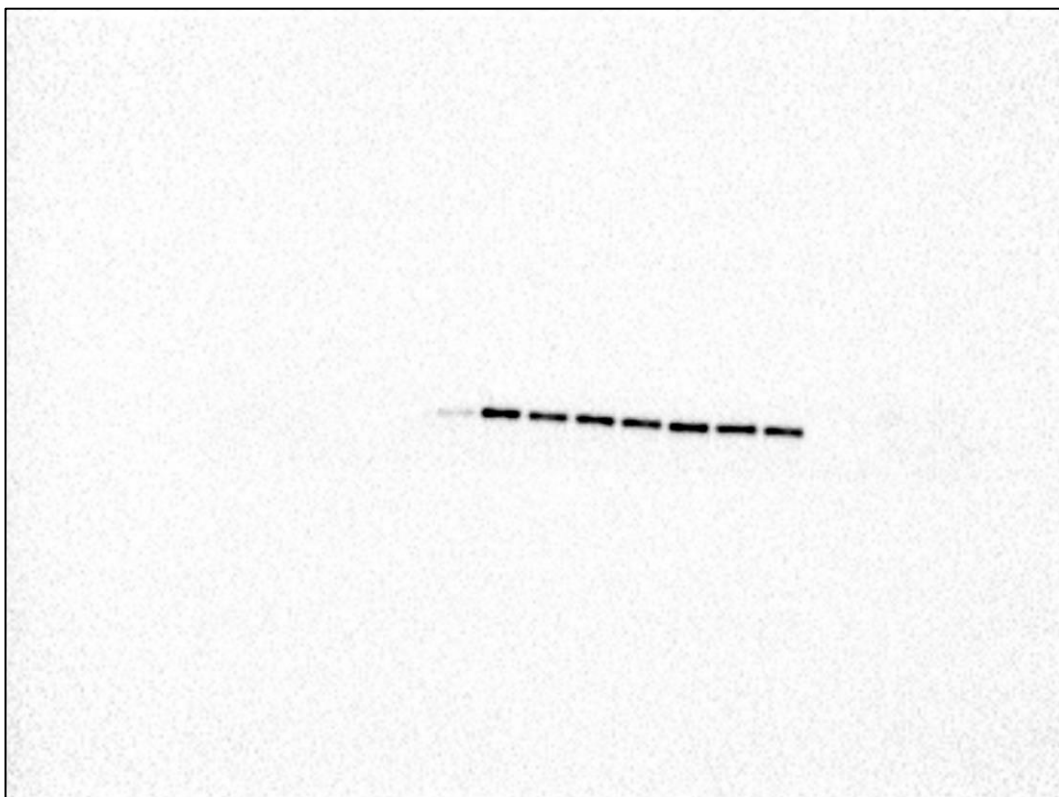

Repeat 3 of HSP-70, lanes from left to right: Control, Model, RES 25, 50, 100  $\mu$ M, ALA 25, 50, 100  $\mu$ M.

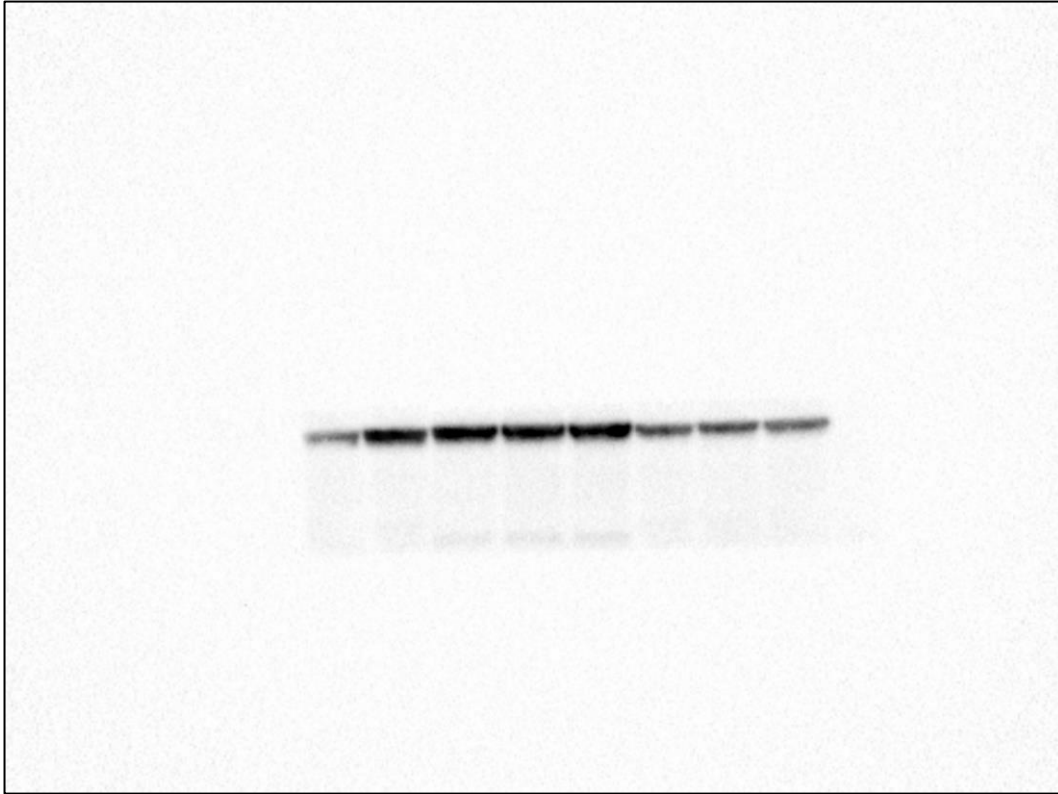

Repeat 3 of HSP-70, lanes from left to right: Control, Model, Arg 0.5, 1.0, 2.0 mM, EPA 12.5, 25, 50  $\mu$ M.

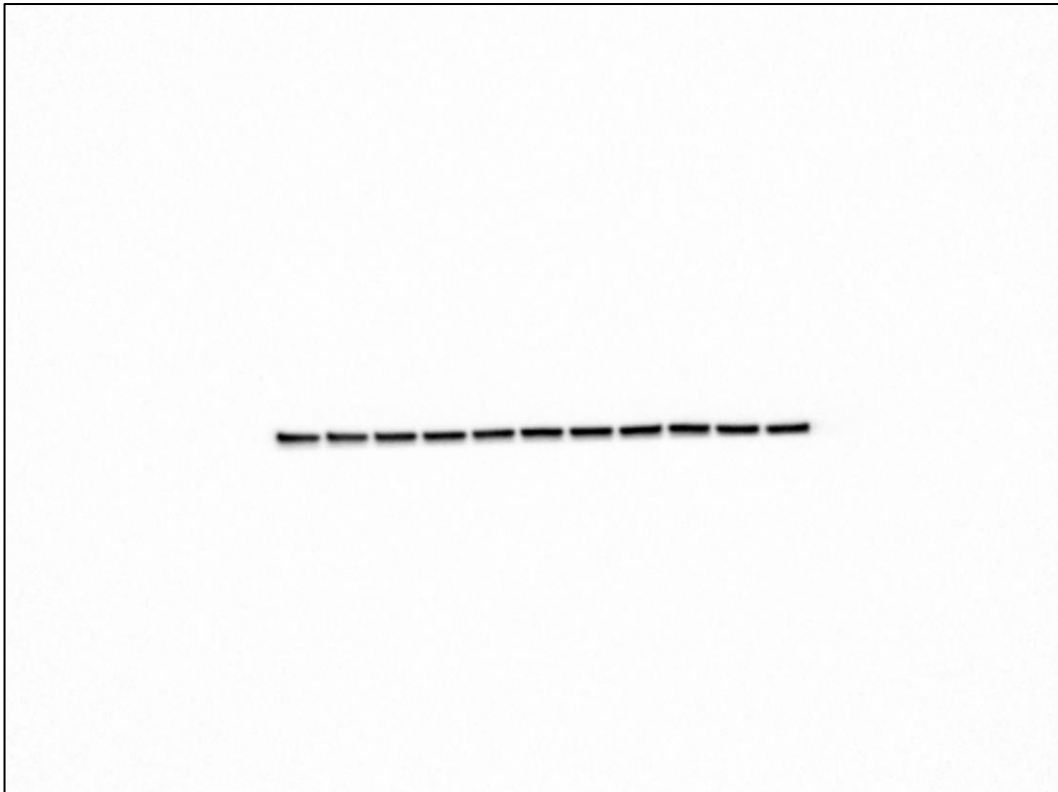

Repeat 1 of  $\beta$ -actin, lanes from left to right: Control, Model, GOS 2.5, 5, 10 mg/ml, FOS 5, 10, 20 mg/ml, COS 2.5, 5, 10 mg/ml.



Repeat 1 of  $\beta$ -actin, lanes from left to right: Control, Model, RES 25, 50, 100  $\mu$ M, ALA 25, 50, 100  $\mu$ M.



Repeat 1 of  $\beta$ -actin, lanes from left to right: Control, Model, Arg 0.5, 1.0, 2.0 mM, EPA 12.5, 25, 50  $\mu$ M.



Repeat 2 of  $\beta$ -actin, lanes from left to right: Control, Model, GOS 2.5, 5, 10 mg/ml, FOS 5, 10, 20 mg/ml, COS 2.5, 5, 10 mg/ml.



Repeat 2 of  $\beta$ -actin, lanes from left to right: Control, Model, RES 25, 50, 100  $\mu$ M, ALA 25, 50, 100  $\mu$ M.



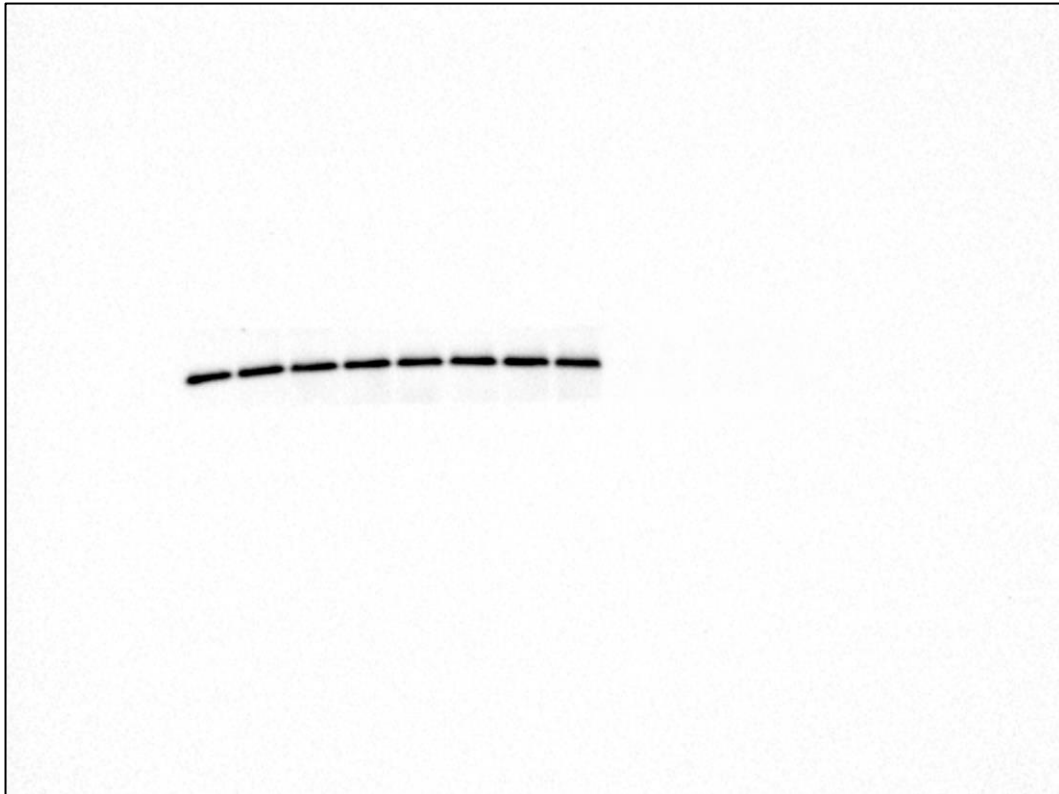

Repeat 2 of  $\beta$ -actin, lanes from left to right: Control, Model, Arg 0.5, 1.0, 2.0 mM, EPA 12.5, 25, 50  $\mu$ M.

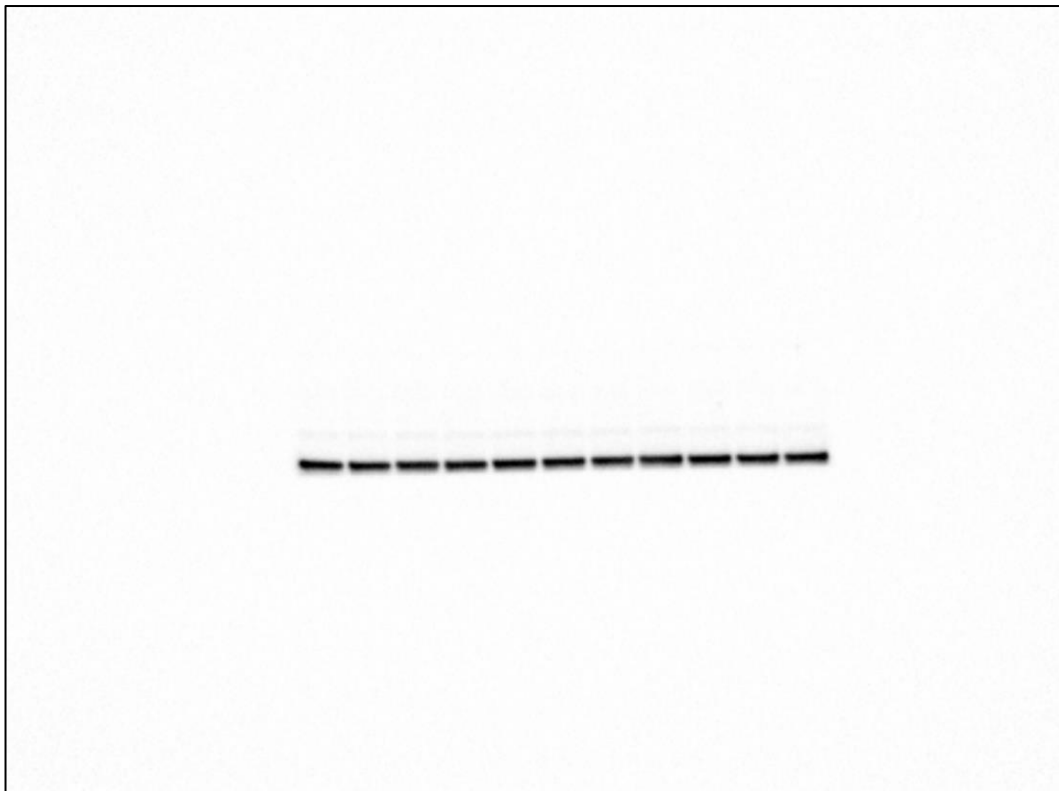

Repeat 3 of  $\beta$ -actin, lanes from left to right: Control, Model, GOS 2.5, 5, 10 mg/ml, FOS 5, 10, 20 mg/ml, COS 2.5, 5, 10 mg/ml.



Repeat 3 of  $\beta$ -actin, upper lanes from left to right: Control, Model, RES 25, 50, 100  $\mu$ M, ALA 25, 50, 100  $\mu$ M; lower lanes from left to right: Control, Model, Arg 0.5, 1.0, 2.0 mM, EPA 12.5, 25, 50  $\mu$ M.

**Original blot images supporting Figure S3:**

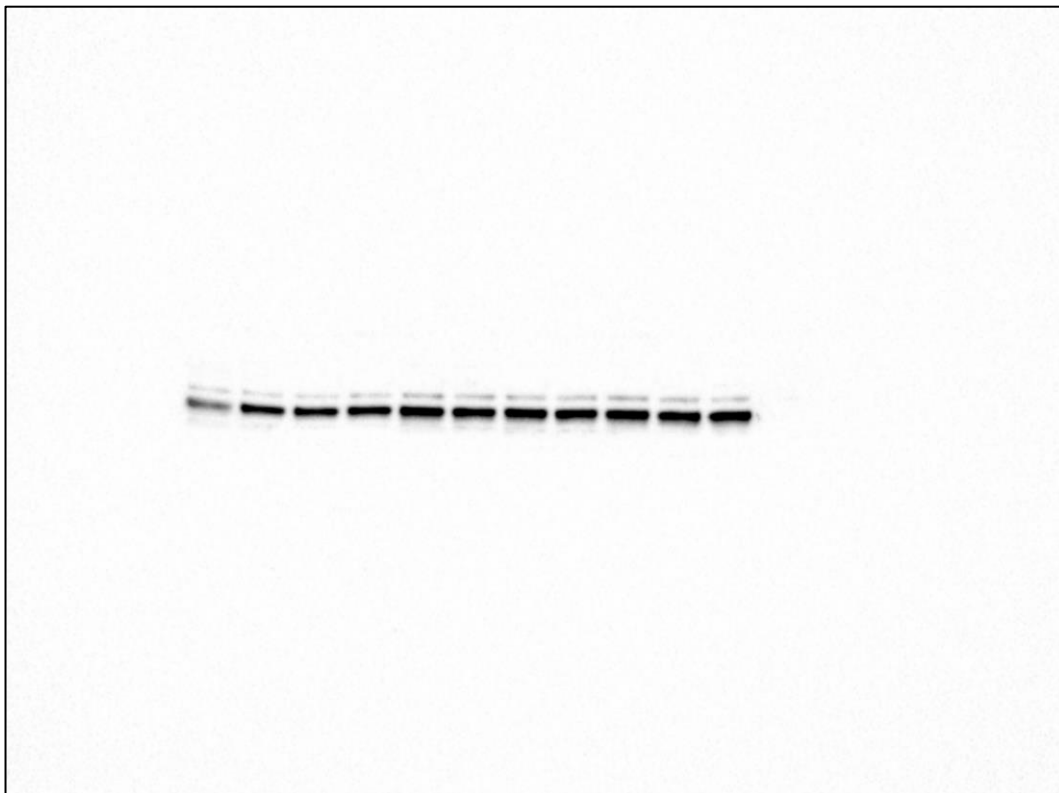

Repeat 1 of HIF-1 $\alpha$ , lanes from left to right: Control, Model, GOS 2.5, 5, 10 mg/ml, FOS 5, 10, 20 mg/ml, COS 2.5, 5, 10 mg/ml.

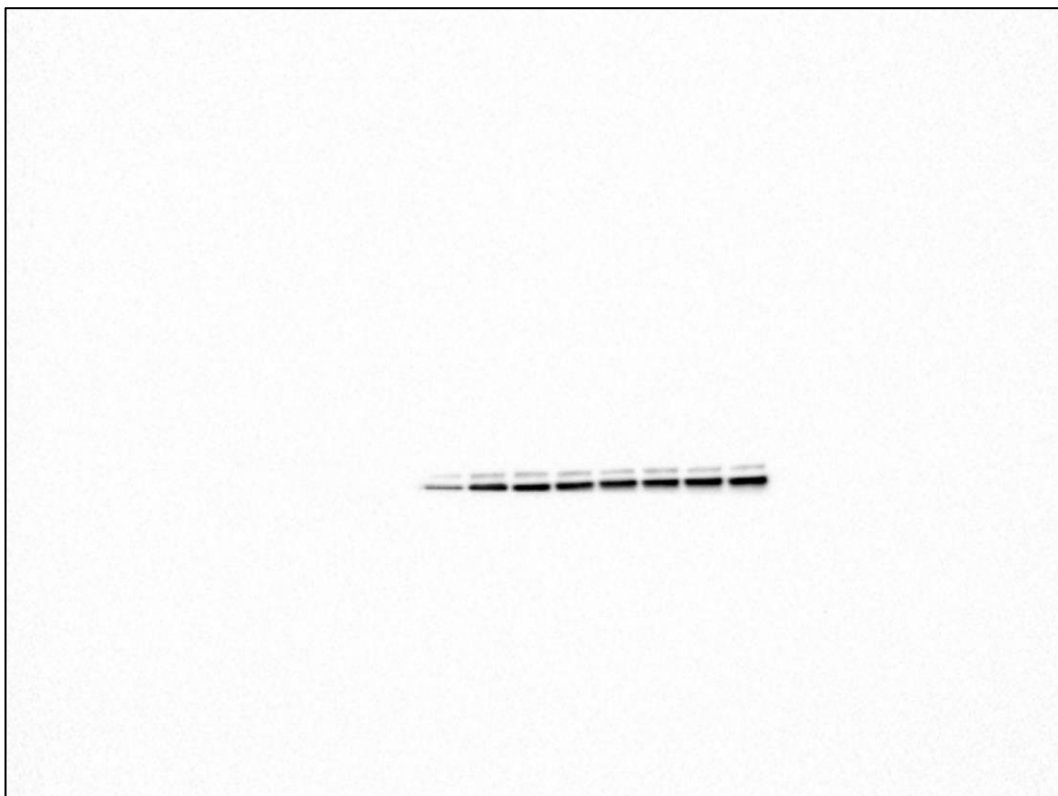

Repeat 1 of HIF-1 $\alpha$ , lanes from left to right: Control, Model, RES 25, 50, 100  $\mu$ M, ALA 25, 50, 100  $\mu$ M.

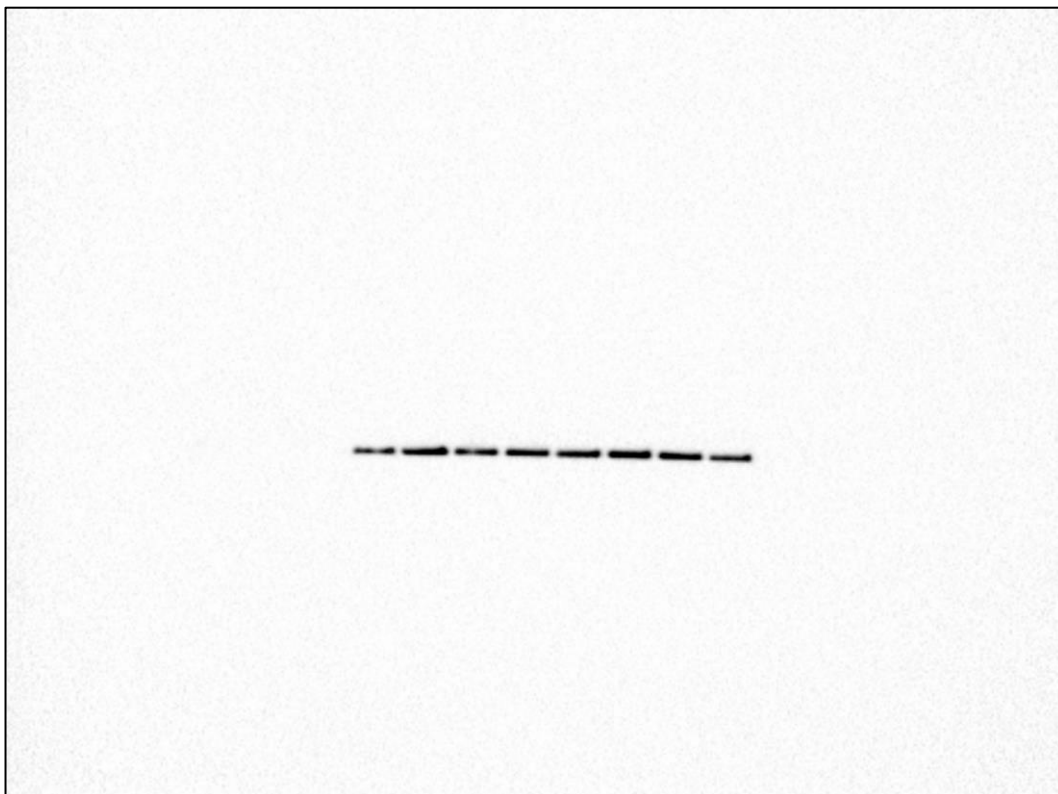

Repeat 1 of HIF-1 $\alpha$ , lanes from left to right: Control, Model, Arg 0.5, 1.0, 2.0 mM, EPA 12.5, 25, 50  $\mu$ M.

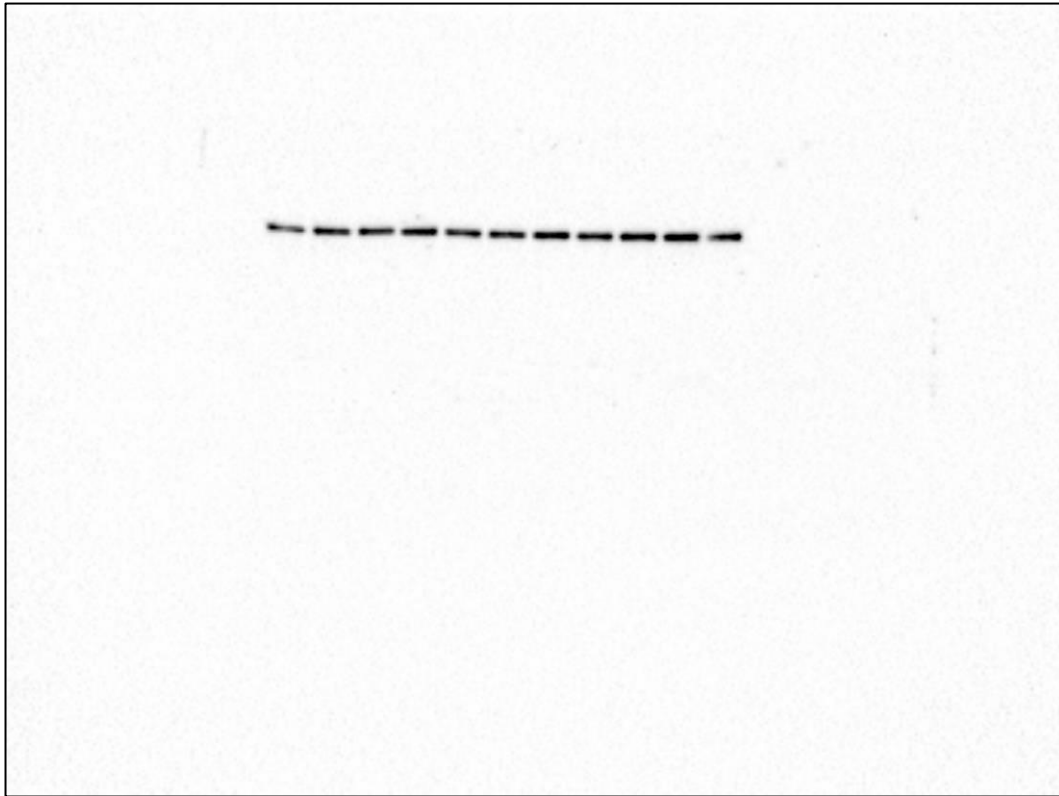

Repeat 2 of HIF-1 $\alpha$ , lanes from left to right: Control, Model, GOS 2.5, 5, 10 mg/ml, FOS 5, 10, 20 mg/ml, COS 2.5, 5, 10 mg/ml.

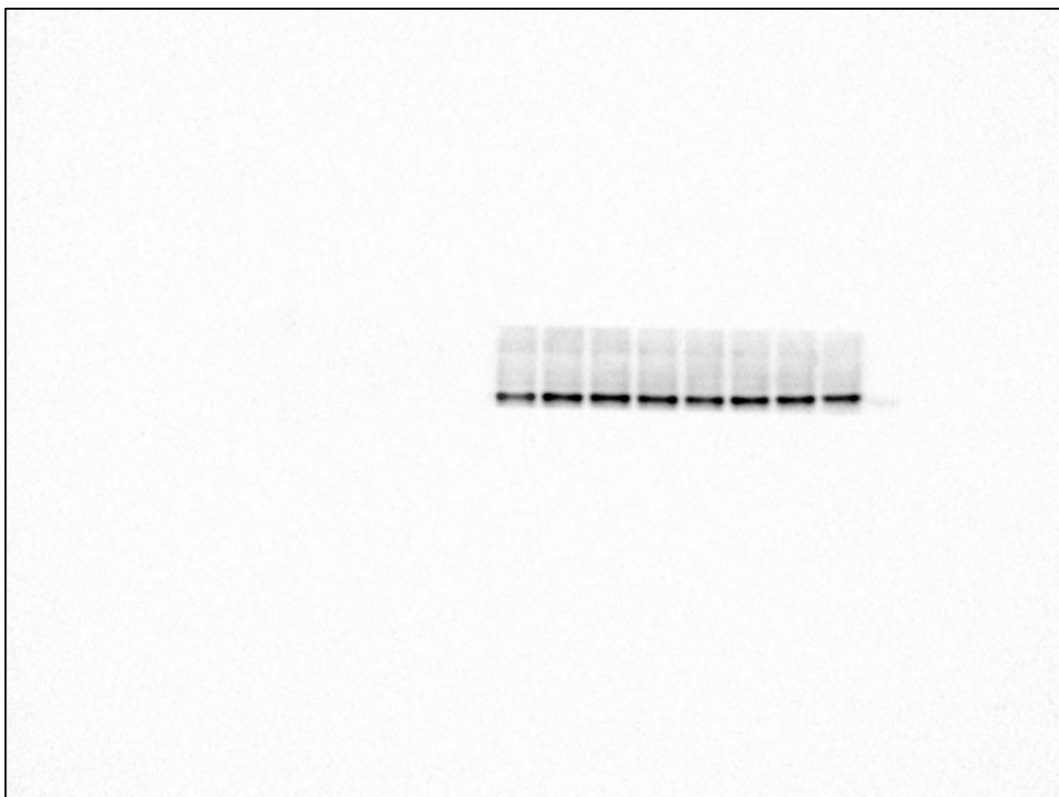

Repeat 2 of HIF-1 $\alpha$ , lanes from left to right: Control, Model, RES 25, 50, 100  $\mu$ M, ALA 25, 50, 100  $\mu$ M.

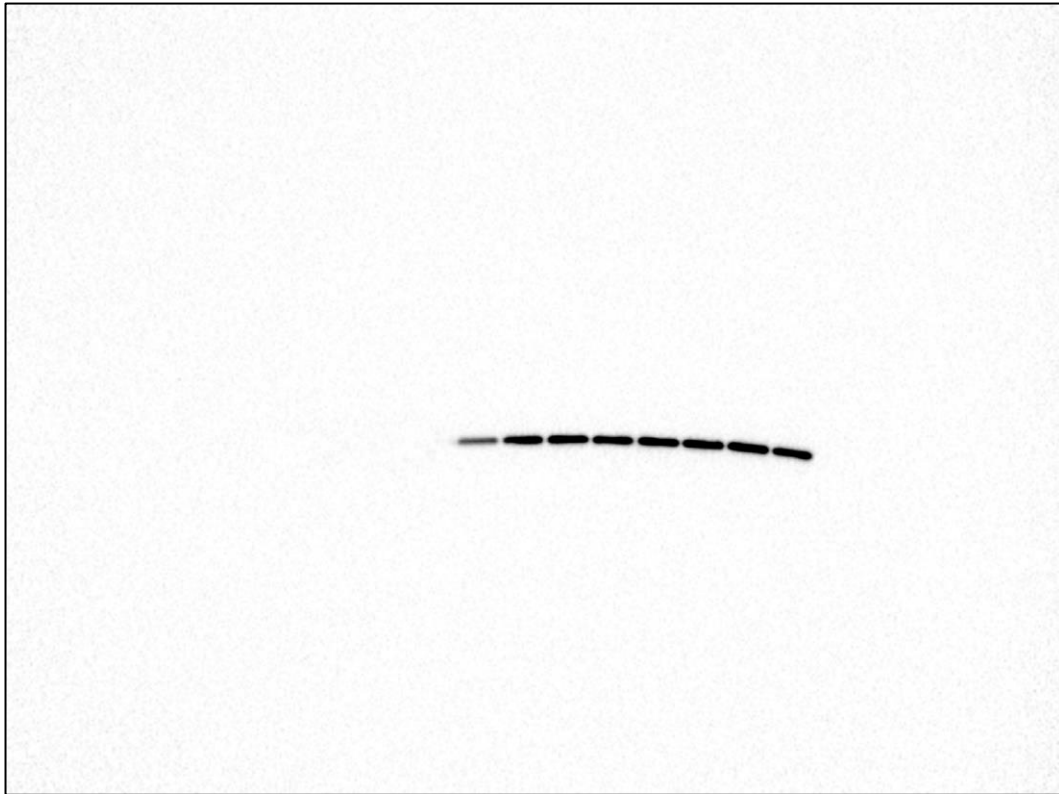

Repeat 2 of HIF-1 $\alpha$ , lanes from left to right: Control, Model, Arg 0.5, 1.0, 2.0 mM, EPA 12.5, 25, 50  $\mu$ M.

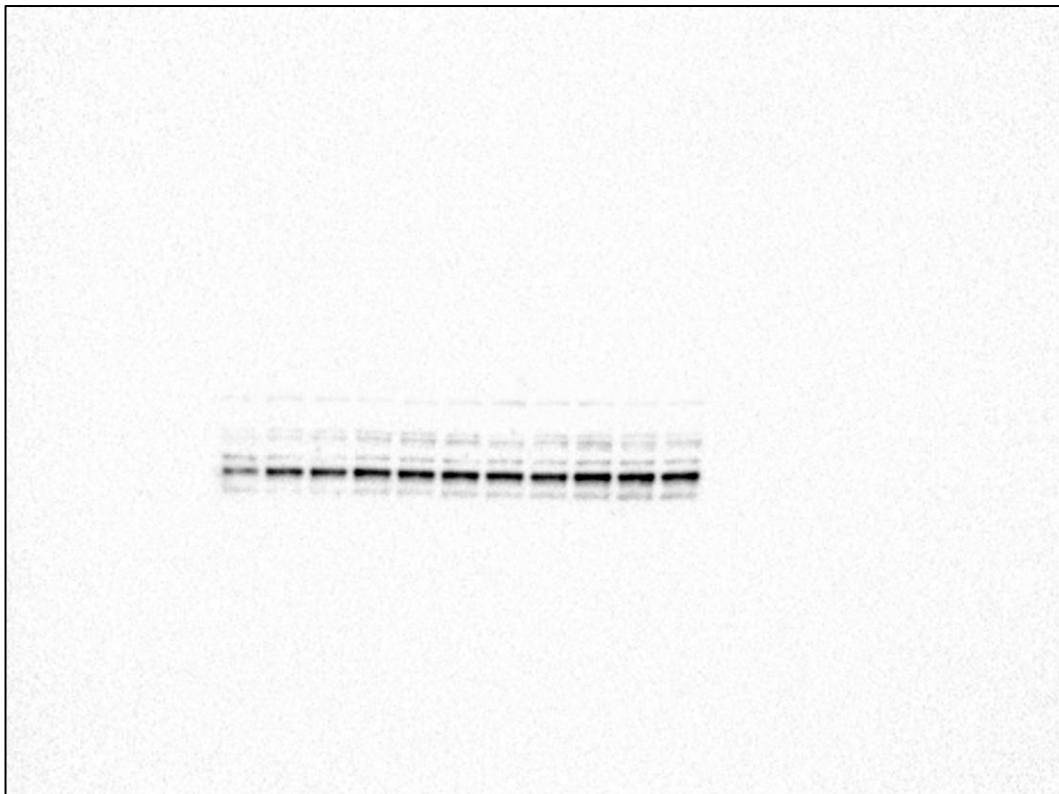

Repeat 3 of HIF-1 $\alpha$ , lanes from left to right: Control, Model, GOS 2.5, 5, 10 mg/ml, FOS 5, 10, 20 mg/ml, COS 2.5, 5, 10 mg/ml.

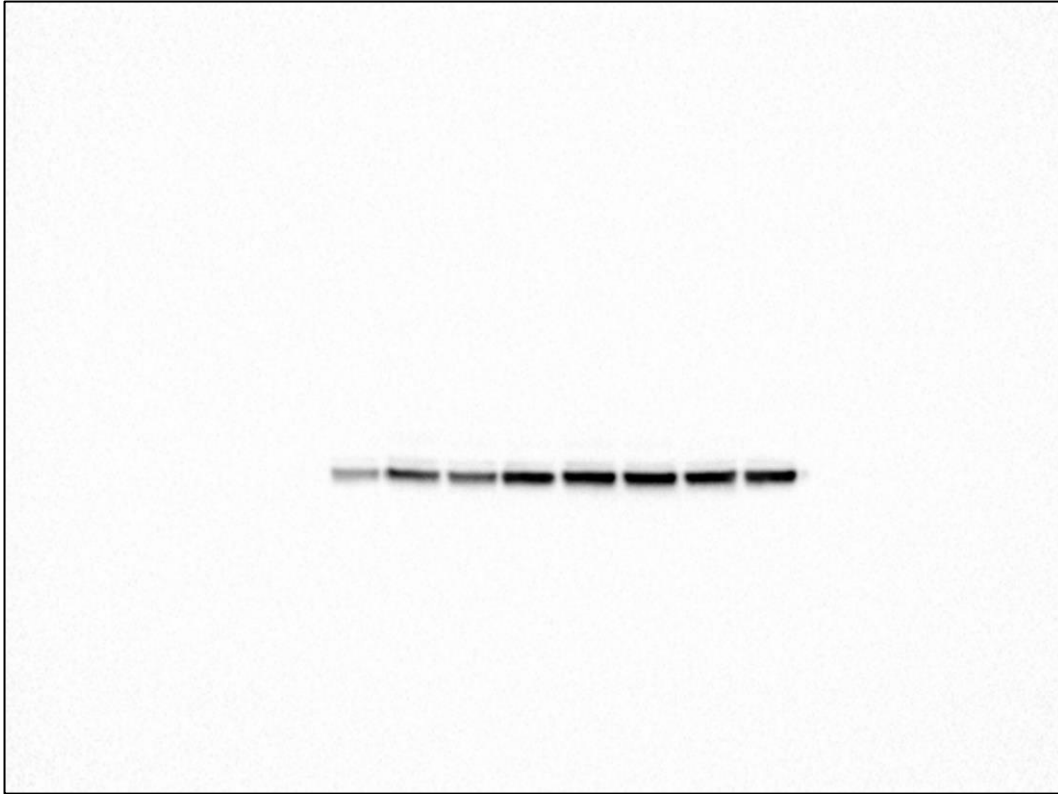

Repeat 3 of HIF-1 $\alpha$ , lanes from left to right: Control, Model, RES 25, 50, 100  $\mu$ M, ALA 25, 50, 100  $\mu$ M.

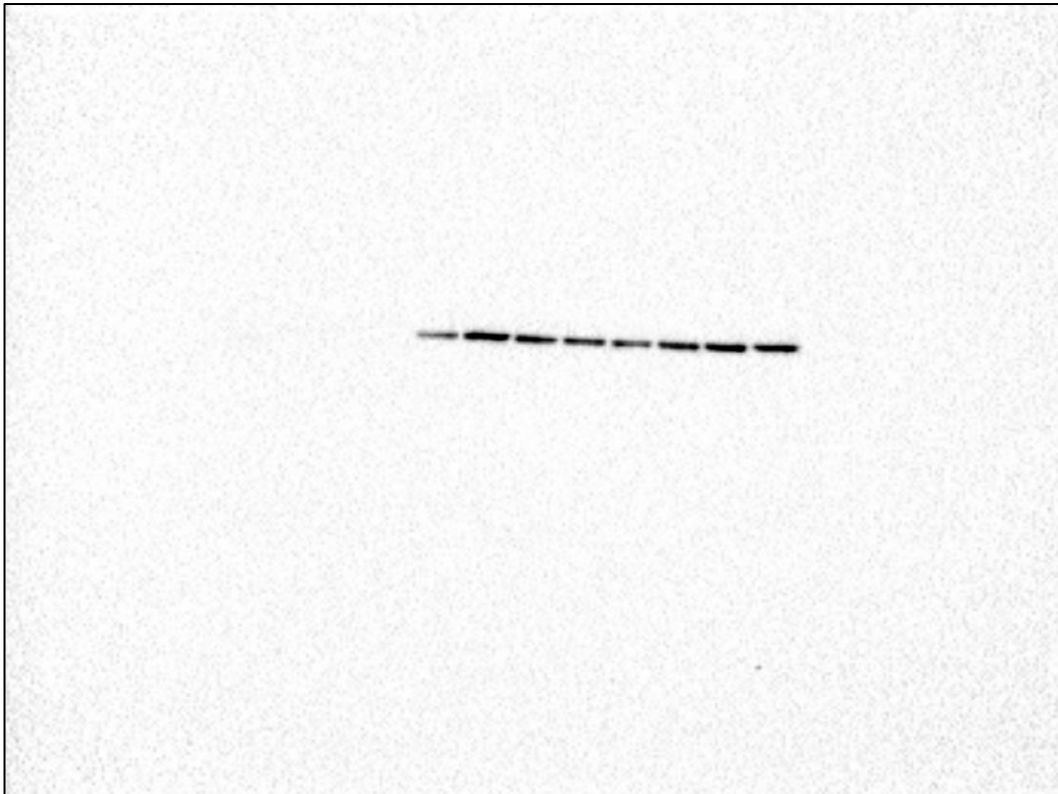

Repeat 3 of HIF-1 $\alpha$ , lanes from left to right: Control, Model, Arg 0.5, 1.0, 2.0 mM, EPA 12.5, 25, 50  $\mu$ M.



Repeat 1 of  $\beta$ -actin, lanes from left to right: Control, Model, GOS 2.5, 5, 10 mg/ml, FOS 5, 10, 20 mg/ml, COS 2.5, 5, 10 mg/ml.



Repeat 1 of  $\beta$ -actin, lanes from left to right: Control, Model, RES 25, 50, 100  $\mu$ M, ALA 25, 50, 100  $\mu$ M.

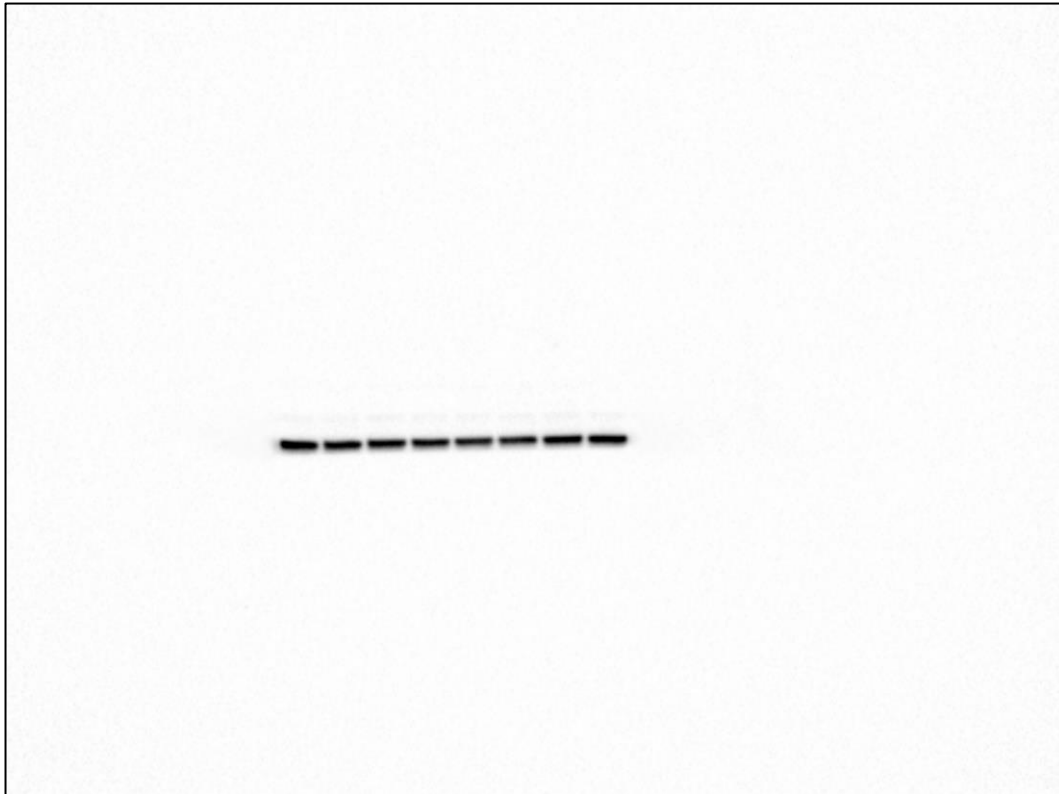

Repeat 1 of  $\beta$ -actin, lanes from left to right: Control, Model, Arg 0.5, 1.0, 2.0 mM, EPA 12.5, 25, 50  $\mu$ M.

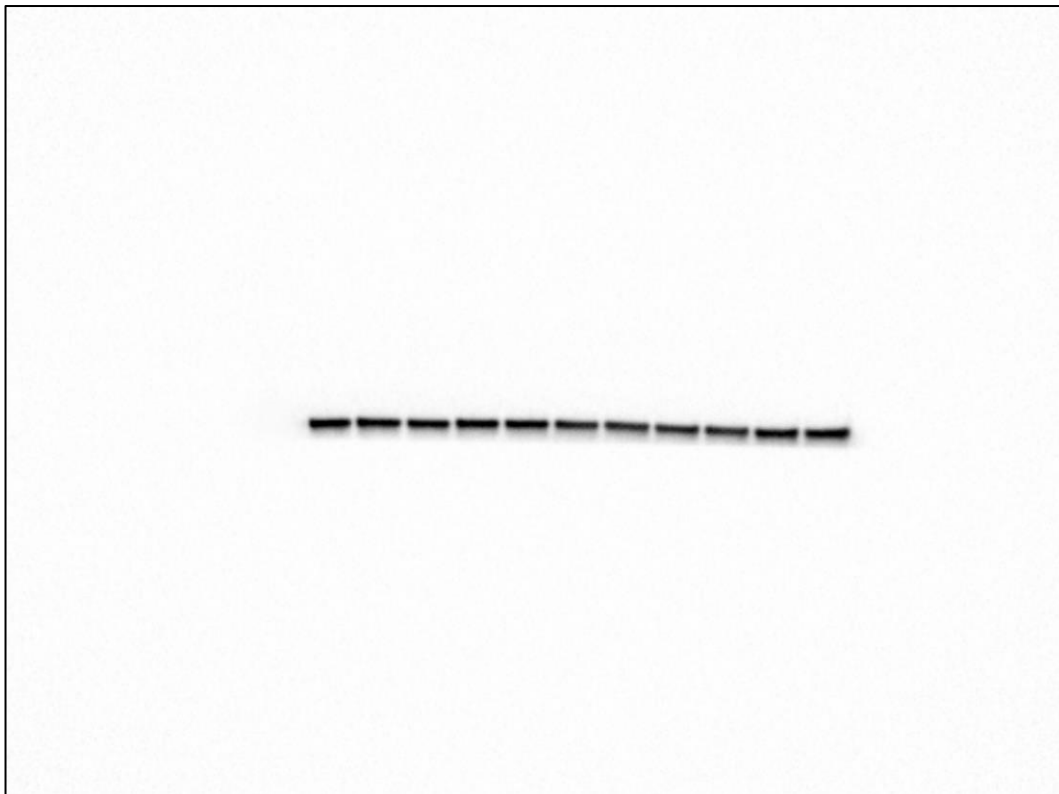

Repeat 2 of  $\beta$ -actin, lanes from left to right: Control, Model, GOS 2.5, 5, 10 mg/ml, FOS 5, 10, 20 mg/ml, COS 2.5, 5, 10 mg/ml.



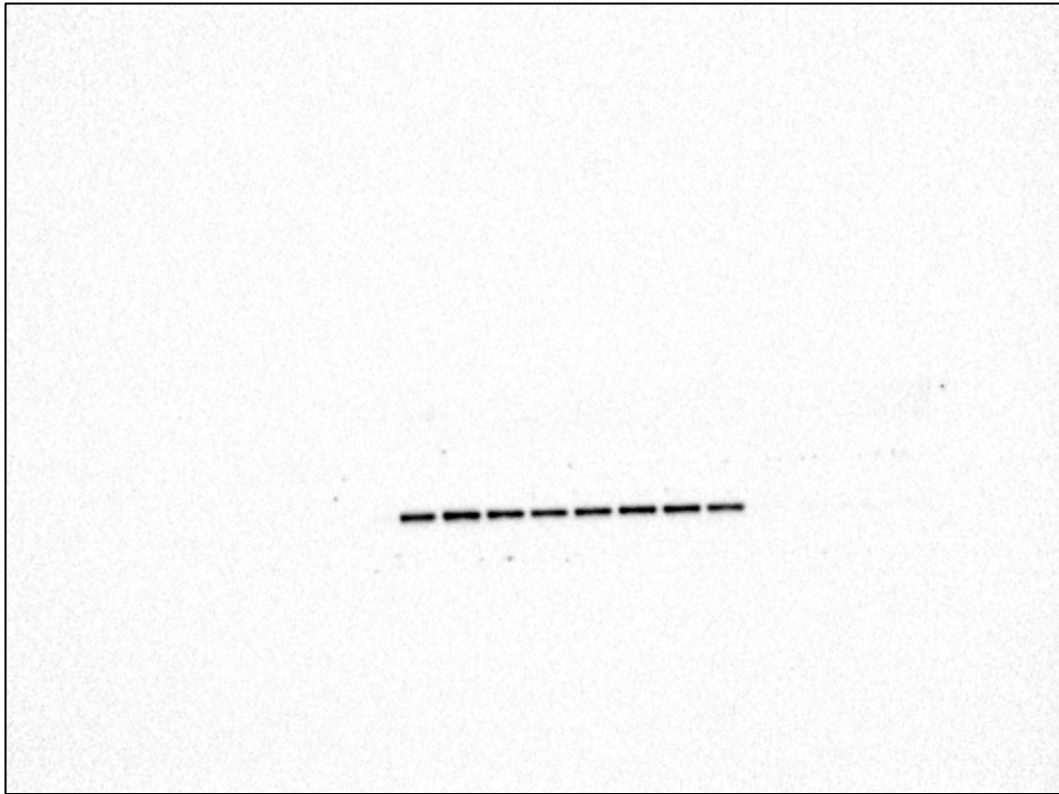

Repeat 2 of  $\beta$ -actin, lanes from left to right: Control, Model, RES 25, 50, 100  $\mu$ M, ALA 25, 50, 100  $\mu$ M.

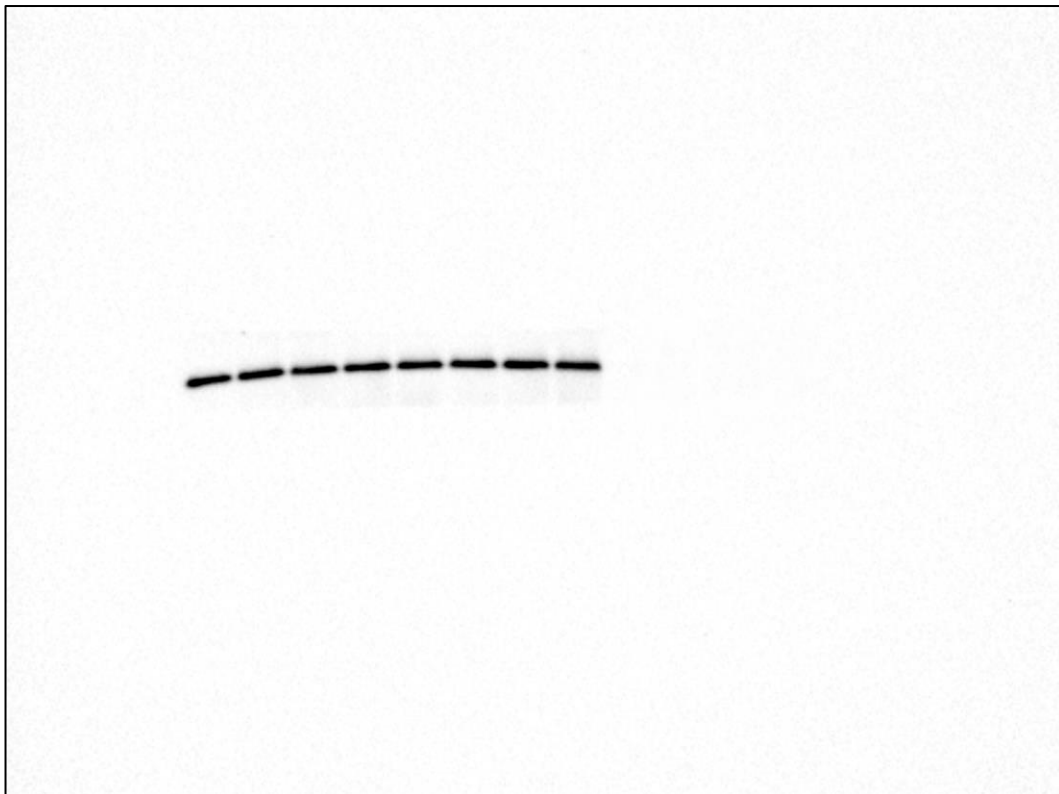

Repeat 2 of  $\beta$ -actin, lanes from left to right: Control, Model, Arg 0.5, 1.0, 2.0 mM, EPA 12.5, 25, 50  $\mu$ M.



Repeat 3 of  $\beta$ -actin, lanes from left to right: Control, Model, GOS 2.5, 5, 10 mg/ml, FOS 5, 10, 20 mg/ml, COS 2.5, 5, 10 mg/ml.



Repeat 3 of  $\beta$ -actin, upper lanes from left to right: Control, Model, RES 25, 50, 100  $\mu$ M, ALA 25, 50, 100  $\mu$ M; lower lanes from left to right: Control, Model, Arg 0.5, 1.0, 2.0 mM, EPA 12.5, 25, 50  $\mu$ M.
